24 **Abstract**

25 The highly mutated and transmissible Omicron variant has provoked serious  
26 concerns over its decreased sensitivity to the current coronavirus disease 2019  
27 (COVID-19) vaccines and evasion from most anti-severe acute respiratory  
28 syndrome coronavirus 2 (SARS-CoV-2) neutralizing antibodies (NAbs). In this  
29 study, we explored the possibility of combatting the Omicron variant by  
30 constructing bispecific antibodies based on non-Omicron NAbs. We engineered  
31 ten IgG-like bispecific antibodies with non-Omicron NAbs named GW01, 16L9,  
32 4L12, and REGN10987 by fusing the single-chain variable fragments (scFvs)  
33 of two antibodies through a linker and then connecting them to the Fc region of  
34 IgG1. Surprisingly, eight out of ten bispecific antibodies showed high binding  
35 affinity to the Omicron receptor-binding domain (RBD) and exhibited extreme  
36 breadth and potency against pseudotyped SARS-CoV-2 variants of concern  
37 (VOCs) including Omicron, as well as authentic Omicron(+R346K) variants. Six  
38 bispecific antibodies containing the cross-NAb GW01 neutralized Omicron  
39 variant and retained their abilities to neutralize other sarbecoviruses. Bispecific  
40 antibodies inhibited Omicron infection by binding to the ACE2 binding site. A  
41 cryo-electron microscopy (cryo-EM) structure study of the representative  
42 bispecific antibody FD01 in complex with the Omicron spike (S) revealed 5  
43 distinct trimers and one unique bi-trimer conformation. The structure and  
44 mapping analyses of 34 Omicron S variant single mutants elucidated that two  
45 scFvs of the bispecific antibody synergistically induced the RBD-down  
46 conformation into 3-RBD-up conformation, enlarged the interface area,  
47 accommodated the S371L mutation, improved the affinity between a single IgG  
48 and the Omicron RBD, and hindered ACE2 binding by forming bi-trimer  
49 conformation. Our study offers an important foundation for anti-Omicron NAb  
50 design. Engineering bispecific antibodies based on non-Omicron NAbs may  
51 provide an efficient solution to combat the Omicron variant.

52

## 53 INTRODUCTION

54 Omicron, first identified in South Africa and reported to the WHO at the end of  
55 Nov. 2021, became the dominant severe acute respiratory syndrome  
56 coronavirus 2 (SARS-CoV-2) variant globally in Jan. 2022. Omicron is the most  
57 severely altered version of SARS-CoV-2, with more than 30 mutations in the  
58 spike protein, sixteen of which are in the receptor-binding domain (RBD).  
59 Omicron variants extensively escape neutralization by sera from vaccinated or  
60 convalescent individuals<sup>1-10</sup>. Moreover, most neutralizing antibodies (NAbs),  
61 including many clinical-stage monoclonal antibodies (mAbs), have completely  
62 lost their neutralization potency against Omicron<sup>1,3,4,11</sup>. Therefore, there is an  
63 urgent need to explore and develop countermeasures against the Omicron  
64 variant.

65 In this study, we used four NAbs named GW01, 16L9, 4L12, and REGN10987,  
66 which failed to bind or neutralize the Omicron variant, to engineered full-length  
67 IgG-like bispecific antibodies. We surprisingly found that these bispecific  
68 antibodies could neutralize all the VOCs, including Omicron and authentic  
69 Omicron(+R346K), while the parental antibody cocktail showed no  
70 neutralization against Omicron. Cryo-EM structure study showed six dynamic  
71 states of the Omicron S trimer upon bispecific antibody binding, including a  
72 novel bi-trimer conformation, within which RBDs were all in “up” conformations.  
73 This bi-trimer is critical for inhibiting ACE2 binding and explains the superiority  
74 of the bispecific antibody. These novel bispecific antibodies are strong  
75 candidates for the treatment and prevention of infection with the Omicron  
76 variant and VOCs and other sarbecoviruses that may cause future emerging or  
77 reemerging coronavirus diseases.

78

## 79 RESULTS

80 **Isolation of three non-Omicron neutralizing antibodies from COVID-19**

81 **convalescent individuals**

82 We sorted and cultured SARS-CoV-2 S-specific memory B cells from two  
83 recovered coronavirus disease 2019 (COVID-19) patients and discovered three  
84 anti-SARS-CoV-2 NAb, designated GW01, 4L12, and 16L9. The germlines  
85 and CDR3 of these antibodies are listed in Table S1. All three antibodies  
86 showed strong binding to the RBD of SARS-CoV-2 (**Fig. 1A**). However, they  
87 had no or weak binding to the S trimer or S RBD of the Omicron variant (**Fig.**  
88 **1A**).

89 GW01, 4L12, and 16L9 potently neutralized SARS-CoV-2 and the VOCs Alpha,  
90 Beta, Gamma, and Delta, but they failed to neutralize the Omicron variant (**Fig.**  
91 **1B**). A panel of control NAb failed to neutralize the Omicron except S309. S309  
92 neutralized Omicron to a similar degree as previous reports<sup>12,13</sup>. GW01 was a  
93 cross-NAb that was able to neutralize SARS-CoV and the SARS-related  
94 coronaviruses (SARSr-CoVs) RS3367 and WIV1. GW01 antibodies showed no  
95 competition with 4L12, 16L9 or the control antibody REGN10987 in binding the  
96 RBD (**Fig. 1C**), indicating that GW01 binds to an epitope different from that  
97 bound by 4L12, 16L9, and REGN10987.

98

99 **Binding and neutralization of the Omicron variant by bispecific antibodies**

100 We constructed bispecific antibodies targeting different epitopes in the RBD  
101 using GW01 in combination with 16L9, 4L12, and REGN10987, and explored  
102 their possibilities to neutralize Omicron variant. We linked the single-chain  
103 variable fragments (scFvs) of the parental antibodies with a (Gly<sub>4</sub>Ser)<sub>4</sub> linker  
104 and then fused them to a hinge-CH<sub>2</sub>-CH<sub>3</sub> fragment of human immunoglobulin  
105 (hIgG1 Fc) to generate a single gene-encoded IgG-like bispecific antibody (**Fig.**  
106 **2A**). For example, the sequence order of the GW01-16L9 (FD01) bispecific  
107 antibody was as follows: GW01 VL-(Gly<sub>4</sub>Ser)<sub>3</sub>-GW01 VH-(Gly<sub>4</sub>Ser)<sub>4</sub>-16L9 VL-  
108 (Gly<sub>4</sub>Ser)<sub>3</sub>-16L9 VH-hinge-CH<sub>2</sub>-CH<sub>3</sub>. SDS-PAGE results showed that the size  
109 of the single chain of two representative bispecific antibodies, GW01-16L9 and

110 16L9-GW01, was approximately 100 kDa and that the purity was >95% (**Fig.**  
111 **2B**). Crosslinking bispecific antibodies with glutaraldehyde revealed that the full  
112 size of the bispecific antibodies was approximately 200 kDa, which was 10%  
113 larger than that of the parental antibodies (180 kDa, **Fig. 2B**).

114 We constructed ten bispecific antibodies and tested their binding abilities to the  
115 RBD or S trimer of SARS-CoV-2 and the Omicron variant. Eight bispecific  
116 antibodies, FD01 (GW01-16L9), 16L9-GW01, GW01-REGN10987,  
117 REGN10987-GW01, GW01-4L12, 4L12-GW01, 4L12-REGN10987, and 4L12-  
118 16L9, not only strongly bound to the RBD of SARS-CoV-2 and the S trimer and  
119 RBD proteins of the Omicron variant (**Fig. 2C**) but also showed high binding  
120 affinity to these proteins (**Fig. 2D**). These results indicated that the structure of  
121 the bispecific antibody increased the parental antibody binding affinity to the  
122 Omicron RBD.

123 To understand the breadth of these bispecific antibodies, we performed a  
124 neutralization assay using SARS-CoV-2 pseudoviruses, including Alpha, Beta,  
125 Gamma, Delta, and Omicron variants, and the sarbecoviruses SARS-CoV,  
126 WIV1 and RS3367. Surprisingly, these eight bispecific antibodies potently  
127 neutralized the Omicron variant with IC<sub>50</sub> values from 39.7 to 548 ng/ml. Six  
128 bispecific antibodies containing the cross-NAb GW01 strongly neutralized all  
129 the tested VOCs and sarbecoviruses (**Fig. 2E**). FD01 and GW01-REGN10987  
130 were the best broadly NAb, with geometric mean (GM) IC<sub>50</sub> values of 25.4  
131 and 12.1 ng/ml, respectively. 4L12-REGN10987 and 4L12-16L9 strongly  
132 neutralized all the tested VOCs with GM IC<sub>50</sub> values of 6.9 and 6.8 ng/ml,  
133 respectively (**Fig. 2E**). However, the parental NAb combinations showed no  
134 neutralization against the Omicron variant (**Fig. 2E**). Taken together, these data  
135 indicated that bispecific antibodies consisting of non-Omicron NAb efficiently  
136 neutralize the Omicron variant in a way that is different from the antibody  
137 cocktail.

138 To confirm the neutralization efficacy of the bispecific antibodies, we performed

139 plaque reduction neutralization assays with an authentic Omicron variant  
140 containing the R346K mutation, which escapes more SARS-CoV-2 NABs than  
141 the Omicron variant<sup>3</sup>. All five representative bispecific antibodies efficiently  
142 neutralized the live Omicron variant (**Fig. 2F**), confirming that the bispecific  
143 antibodies composed of non-Omicron NABs are able to neutralize the Omicron  
144 variant.

145

#### 146 **Bispecific antibodies bind to the ACE2-binding site**

147 Competition assays were then performed to evaluate the abilities of the  
148 bispecific antibodies to inhibit the binding of SARS-CoV-2 RBD to the  
149 recombinant ACE2 protein (**Fig. 2G**). All five representative bispecific  
150 antibodies prevented RBD binding to ACE2 protein, while the control antibody  
151 S309 did not affect the S/ACE2 interaction. FD01 showed a strong inhibitory  
152 effect against ACE2 binding. These results indicated that bispecific antibodies  
153 inhibit Omicron variant infection by occupying the ACE2-binding site on the  
154 RBD.

155

#### 156 **Snapshots of Omicron S-FD01 structures determined by cryo-EM**

157 To further investigate the neutralization mechanism of the bispecific antibodies,  
158 we chose FD01 (GW01-16L9) as a representative antibody for structural study.  
159 Local refinement focused on the RBD and ScFvs improved the interface region  
160 to 3.51 Å resolution and allowed us to unambiguously build the RBD and scFvs  
161 (**Table S2**). We determined the cryo-EM structure of the prefusion stabilized  
162 SARS-CoV-2 Omicron S ectodomain trimer in complex with the bispecific  
163 antibody FD01 (Omicron S-FD01), revealing 6 states of the complex: In the  
164 state 1 Omicron S-FD01 structure (~26% of the particles), only one 16L9 binds  
165 to the “up” RBD, and the two down RBDs have no antibody binding (up-down-  
166 down RBDs, 1 scFv, 3.47 Å). In state 2 (~38%), the bispecific antibody FD01  
167 (GW01-16L9) binds to a widely open RBD, the so-called “wide\_up” state, 16L9  
168 binds to an “up” RBD, and the third RBD remains in a down state (wide\_up-up-

169 down RBDs, 3 scFvs, 3.70 Å). In both state 3 (~8%) and state 4 (~15%), two  
170 FD01 (GW01-16L9) bind separately to two “wide\_up” state RBDs, and the third  
171 RBD represents the half-up conformation in state 3 (wide\_up-wide\_up-half\_up  
172 RBDs, 4 scFvs, 3.91 Å) and the up conformation in state 4 (wide\_up-wide\_up-  
173 up RBDs, 4 scFvs, 3.47 Å), without antibody binding. In state 5 (~4%), all RBDs  
174 are in the “wide\_up” state, each bound with an FD01 (GW01-16L9) (all wide\_up  
175 RBDs, 6 scFvs, 3.87 Å). In the final state 6 (~4% of the particles), two state 5  
176 trimers are connected by three bispecific FD01 antibodies, forming a bi-trimer  
177 structure (bi-trimer, all wide\_up RBDs, 12 scFvs, 6.11 Å) (**Fig. 3, Fig. S2 and**  
178 **S3**).

179

### 180 **Collaborative binding mechanism of FD01 bispecific antibody**

181 These six cryo-EM structures represent the conformational transitions of the  
182 Omicron S trimer upon FD01 binding. To simplify the presentation, three  
183 protomers of a spike trimer are clockwise defined as 1, 2, and 3 (**Fig. 3, Fig.**  
184 **4**). The apo spike trimer (state 0) includes one regular up RBD and two down  
185 RBDs. First, 16L9 binds to the “up” RBD (RBD-1) of the apo spike trimers and  
186 forms the state 1 confirmation. After that, GW01, connected with 16L9, binds to  
187 RBD-1, inducing it into a wide\_up state (via an ~13 Å outward motion) and  
188 pushing RBD-2 to flip from the “down” to the “up” state, making enough space  
189 to accommodate the first bispecific antibody FD01 (16L9 and GW01) on RBD-  
190 1 and the 16L9 of the second FD01 on RBD-2. A slight ~3 Å inward motion of  
191 RBD-3 is induced by the neighboring RBD-2 to stabilize this state (state 2).  
192 Then, in state 3, the “up” RBD-2 opens up further to the “wide\_up” state,  
193 allowing both 16L9 and GW01 of the second FD01 to bind RBD-2. In addition,  
194 RBD-3 is pushed up to a “half\_up” state. In state 4, the “half\_up” RBD-3 opens  
195 up to the regular “up” state and is ready for 16L9 binding. Following that, in state  
196 5, the third FD01 binds to RBD-3 and induces RBD-3 to adopt the “wide\_up”



197 state. Finally, two trimers in state 5 form a bi-trimer induced by three pairs of Fc  
198 regions from six antibodies.

199 Thus, the six states represent the continuous conformational transitions starting  
200 from the first 16L9 binding to three FD01 binding and the final bi-trimer  
201 formation, which inhibits the ACE2 binding by aggregating virions. In addition to  
202 the motion of RBDs, the N-terminal domains (NTDs) of the trimer are also  
203 moved or rotated following the motion of their neighboring RBDs.

204

### 205 **FD01 targets two conserved epitopes**

206 16L9 and GW01 bind to two different sites of one RBD (**Fig. 5A**). The epitope  
207 of 16L9 almost overlaps with the receptor-binding motif (RBM), while GW01  
208 binds outside the RBM. The binding of 16L9 and the RBD buries a 1061 Å<sup>2</sup>  
209 surface area, and a total of 20 residues from RBD are involved. The interaction  
210 between 16L9 and RBD is largely driven by extensive hydrophilic and  
211 hydrophobic interactions between CDRH1, CDRH2, CDRH3 and CDRL1 of  
212 16L9 and RBD (**Fig. 5C**). Residues D405, T415, D420, Y421, Y453, L455, F456,  
213 Y473, A475, N477, Y489, R493, P500, Y501, and H505 of the RBD are involved  
214 in this interaction, forming 14 pairs of hydrogen bonds and 3 patches of  
215 hydrophobic interactions (**Fig. 5C**). In addition, the hydrogen bond between S96  
216 of CDRL3 and R403 from the RBD and the salt bridge between E52 of CDRL2  
217 and R493 from the RBD further enhance the interaction (**Fig. 5C**).  
218 Coincidentally, residues Y453, A475, Y489, R493, T500, Y501, and H505 of the  
219 Omicron RBD are important for ACE2 recognition and binding<sup>14</sup>. The  
220 neutralization activity test showed that 16L9 alone was able to broadly  
221 neutralize SARS-CoV-2 and SARS-CoV-2 variants. This result implies that  
222 16L9 targets the conserved residues of the RBM, which is needed for receptor  
223 binding.

224 GW01 interacts with another novel conserved epitope beyond the binding site  
225 of 16L9. The binding site of GW01 and the RBD has a buried surface area of  
226 668.2 Å. The interaction between GW01 and the RBD is mainly contributed by



227 CDRH3. The long loop (226-YGPPDVFNY-234) of CDRH3 engages with Y369,  
228 F374, T376, F377, Y508, and V503 from the RBD, forming 3 patches of  
229 hydrophobic interactions and 2 pairs of hydrogen bonds. D155 on CDRH1 and  
230 N53 on CDRL2 are also involved in the interaction by forming hydrogen bonds  
231 between V503 and N370, respectively (**Fig. 5D**).

232 Interestingly, the simultaneous binding of 16L9 and GW01 with the RBD  
233 introduces additional interactions. Hydrogen bonds are formed between N178  
234 and N196 of GW01 and S26, Y93, S96 and N98 of 16L9 (**Fig. 5B**), which further  
235 enhances the interaction between FD01 and S.

236 Structural alignment of the 16L9-GW01-RBD complex with the ACE2-RBD  
237 complex indicated that both 16L9 and GW01 were able to compete with ACE2  
238 when binding to the RBD (**Fig. 5E**), which is consistent to the competition assay.

239

## 240 **Bispecific antibodies accommodated the mutations in the Omicron** 241 **variant**

242 We constructed 34 single mutants of the Omicron variant to identify the key  
243 residues that mediate resistance to GW01, 16L9, 4L12, and REGN0987. The  
244 S371L mutation, which was found to stabilize the Omicron into a single-RBD-  
245 down conformation<sup>12</sup>, greatly decreased the neutralization activities of GW01,  
246 4L12, and REGN10987 (**Table 1**). The S375F mutation decreased the  
247 neutralization activity of GW01 by 16-fold and resulted in resistance to  
248 REGN10987. The K417N mutation resulted in complete resistance to 16L9  
249 (>1000-fold). All six tested bispecific antibodies showed only a slight decrease  
250 (12.4- to 25.5-fold) or no change in neutralization activity against the S371L  
251 mutant. Therefore, bispecific antibodies bind to the ACE2-binding site of the  
252 RBD and accommodate the S371L mutation of the Omicron variant, resulting  
253 in extraordinary breadth for these bispecific antibodies.

254

## 255 **DISCUSSION**

256 The recently emerged SARS-CoV-2 Omicron strain raised unprecedented  
257 global concern about invalidation of most FDA-approved antibody drugs,  
258 including LY-CoV555, LY-CoV016, REGN10933, REGN10987, AZD8895 and  
259 AZD1061<sup>15</sup>. Previous studies have shown that combining two NAbs that target  
260 different neutralizing epitopes in the SARS-CoV-2 S protein increased  
261 therapeutic and prophylactic efficacy. However, the most potent anti-SARS-  
262 CoV-2 antibody cocktail, RENG10933/REGN10987, failed to neutralize the  
263 Omicron variant. Zhou tested 10 antibody combinations against Omicron and  
264 three antibody combinations with increasing neutralization contained a VH1-58  
265 derived anti-Omicron NAb that bound RBD in the “up” position. Cryo-EM  
266 structure showed that the antibody combination with improved neutralization  
267 (B1-182.1/A19-46.1) synergistically induced the 3-RBD-up conformation<sup>12</sup>.  
268 However, this antibody combination approach is not an ideal solution because  
269 few anti-Omicron NAbs are available.

270 Using the NAbs that failed to neutralize the Omicron variant, we constructed a  
271 serial of novel bispecific antibodies that capable of neutralizing all SARA-CoV-  
272 2 variants of concern (VOCs), including the Omicron strain. Interestingly, single  
273 IgG parental antibodies or the combination of parental antibodies failed to  
274 neutralize Omicron, although the neutralization activity against SARS-CoV-2 or  
275 SARS-CoV-2 Alpha, Beta, Gamma, and Delta was remarkable. Thus, the  
276 effective neutralization of Omicron by bispecific antibodies may be due to the  
277 construction of this bispecific antibody.

278 The structure of FD01 (GW01-16L9) bispecific antibody gives a hit at this  
279 collaborative binding mechanism. First, one 16L9 scFv binds to the exposed  
280 epitope of the “up” state RBD-1 in the apo Omicron S trimer as a trigger. Then,  
281 the 20 aa GS linker between 16L9 and GW01 guides GW01 to its targeting  
282 epitope of RBD-1, pushing RBD-1 more open, which unlocks the “down” state  
283 of RBD-2 and induces it to adopt the up state. Thus, another 16L9 scFv could  
284 easily catch the “up” state RBD-2. The same triggering process would occur on  
285 RBD-2 and RBD-3, allowing the binding of the second and the third FD01 to

286 RBD-2 and RBD-3, respectively. GW01 Fab alone could not trigger binding to  
287 the apo state of the Omicron trimer without the help of 16L9 and the GS linker  
288 guider. Although 16L9 can bind to the first “up” state RBD, it lacks the ability to  
289 release other “down” state RBDs for further binding (**Fig. S5**). In summary, the  
290 two scFvs of the GW01-16L9 bispecific antibody have collaborative roles in the  
291 neutralization process. The neutralization mechanism of FD01 may be  
292 mediated by the unique engineering of the combination of two antibodies into  
293 one, which induces RBD-up conformation, enlarges the interface area,  
294 improves the affinity of a single IgG and the RBD, stabilizes the interaction by  
295 additional interactions between the two antibodies, forms bi-trimer which  
296 hinders the ACE2 binding by aggregating virions, and therefore blocks the  
297 infection of SARS-CoV-2 Omicron variant.

298 Taken together, the unique construction of bispecific antibodies enables non-  
299 Omicron NABs to neutralize Omicron variant. Our approach can rescue the  
300 majority of the SARS-CoV-2 antibodies, such as REGN10987, to overcome the  
301 resistance of Omicron and prepare for future SARS-CoV-2 variants.

302

### 303 **ACKNOWLEDGMENTS**

304 We thank Center of Cryo-Electron Microscopy, Fudan University for the  
305 supports on cryo-EM data collection. This work was supported by the National  
306 Natural Science Foundation of China (31771008 to JH and 81900729 to LS),  
307 the National Major Science and Technology Projects of China  
308 (2017ZX10202102 to JH and 2018ZX10301403 to FW), Shanghai Municipal  
309 Health Commission (2018BR08 to JH), the Chinese Academy of Medical  
310 Sciences (2019PT350002 to JH).

311

### 312 **AUTHOR CONTRIBUTIONS**

313 JH, LS, and FW conceived and designed the experiments. JH, ML, and FW

314 performed B cell sorting and antibody cloning. YDW and YJ constructed the  
315 bispecific antibodies and performed neutralization assay, ELISA, bilayer  
316 interferometry experiments. YDW, YJ, and QW constructed and expressed  
317 SARS-CoV-2 pseudovirus mutants and purification antibodies. LS, XZ, WZ, and  
318 ZC performed the structural studies. JZ and YQW were responsible for the  
319 authentic virus experiments. JH, YDW, YJ, FW, LS, XZ, WZ, JZ, and YQW  
320 analyzed the data. YW and TZ supervised the project. JH, LS, FW, YDW, and  
321 XZ wrote the manuscript.

322

### 323 **COMPETING INTERESTS**

324 Patents about the bispecific antibodies in this study are pending.

325



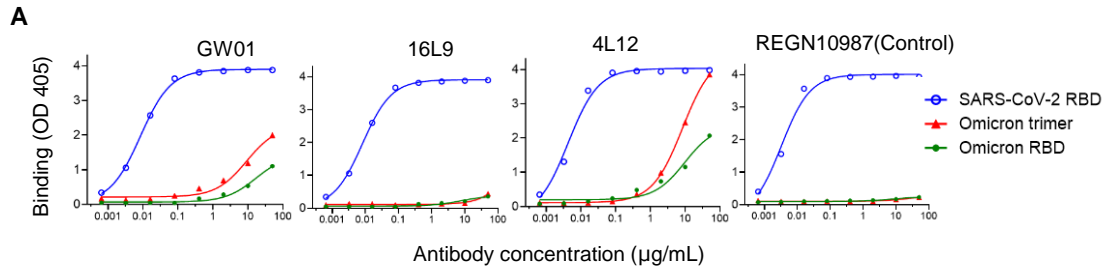

**B**

| Ab / Virus ID | IC50 (ng/ml) |       |         |         |       |         |          |         |         |     | % of Neut | GM IC50 | Median IC50 |
|---------------|--------------|-------|---------|---------|-------|---------|----------|---------|---------|-----|-----------|---------|-------------|
|               | WT           | Alpha | Beta    | Gamma   | Delta | Omicron | SARS-CoV | WIVI    | RS3367  |     |           |         |             |
| GW01          | 23.1         | 15.4  | 51.0    | 89.1    | 50.2  | >10,000 | 56.8     | 2.3     | 1.4     | 89  | 18.7      | 36.6    |             |
| 16L9          | 4.1          | 9.3   | 412     | 5.4     | 7.0   | >10,000 | >10,000  | >10,000 | >10,000 | 56  | 14.2      | 7.0     |             |
| 4L12          | 4.5          | 6.4   | 12.0    | 1.3     | 19.2  | >10,000 | >10,000  | >10,000 | >10,000 | 56  | 6.1       | 6.4     |             |
| S309          | 30.8         | 86.6  | 41.1    | 60.0    | 63.5  | 192     | 24.1     | 113     | 295     | 100 | 73.7      | 63.5    |             |
| REGN10987     | 2.3          | 1.7   | 5.7     | 38.5    | 32.9  | >10,000 | >10,000  | >10,000 | >10,000 | 56  | 7.8       | 5.7     |             |
| CC12.1        | 17.3         | 301   | >10,000 | 24.5    | 20.3  | >10,000 | >10,000  | >10,000 | >10,000 | 44  | 40.1      | 22.4    |             |
| REGN10989     | 5.7          | 0.4   | >10,000 | >10,000 | 2.9   | >10,000 | >10,000  | >10,000 | >10,000 | 33  | 1.8       | 2.9     |             |
| 4A8           | 196          | 2269  | >10,000 | >10,000 | 1224  | >10,000 | >10,000  | >10,000 | >10,000 | 33  | 817       | 1224    |             |

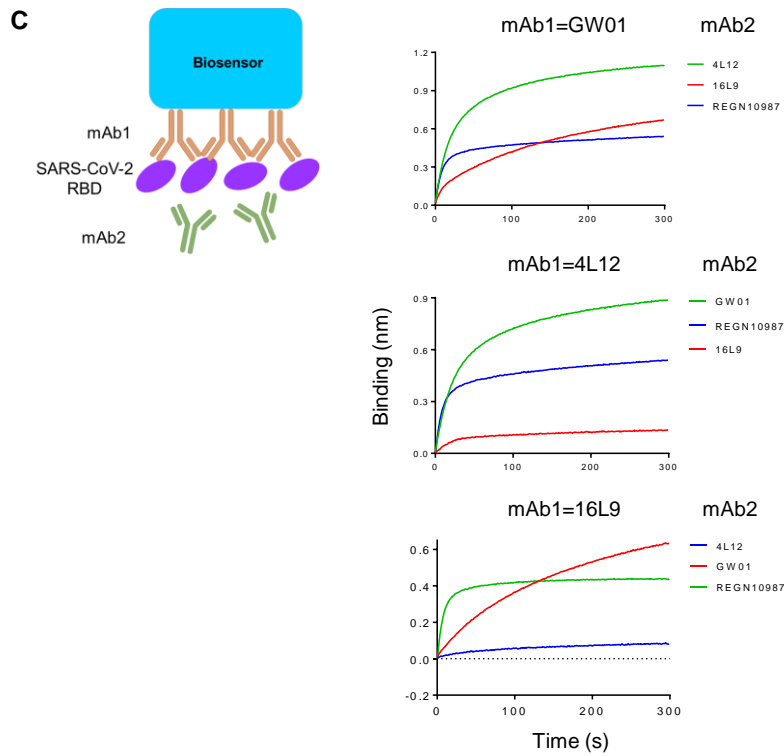

327

328

329 **Figure 1. Isolation of three non-Omicron neutralizing antibodies from**  
330 **COVID-19 convalescent individuals.**

331 **(A)** Binding of GW01, 16L9, and 4L12 to the SARS-CoV-2 RBD, Omicron RBD  
332 and trimer in an ELISA. REGN10987 was used as a control. **(B)** Neutralizing  
333 activities of GW01, 16L9, and 4L12 were determined against pseudotyped  
334 SARS-CoV-2 and its variants Alpha, Beta, Gamma, Delta, and Omicron, as well  
335 as sarbecoviruses. REGN10987 was used as a control. **(C)** Binding of 4L12,  
336 16L9, and RGN10987 to the SARS-CoV-2 RBD in competition with GW01, as  
337 measured by bilayer interferometry experiments.

338

339



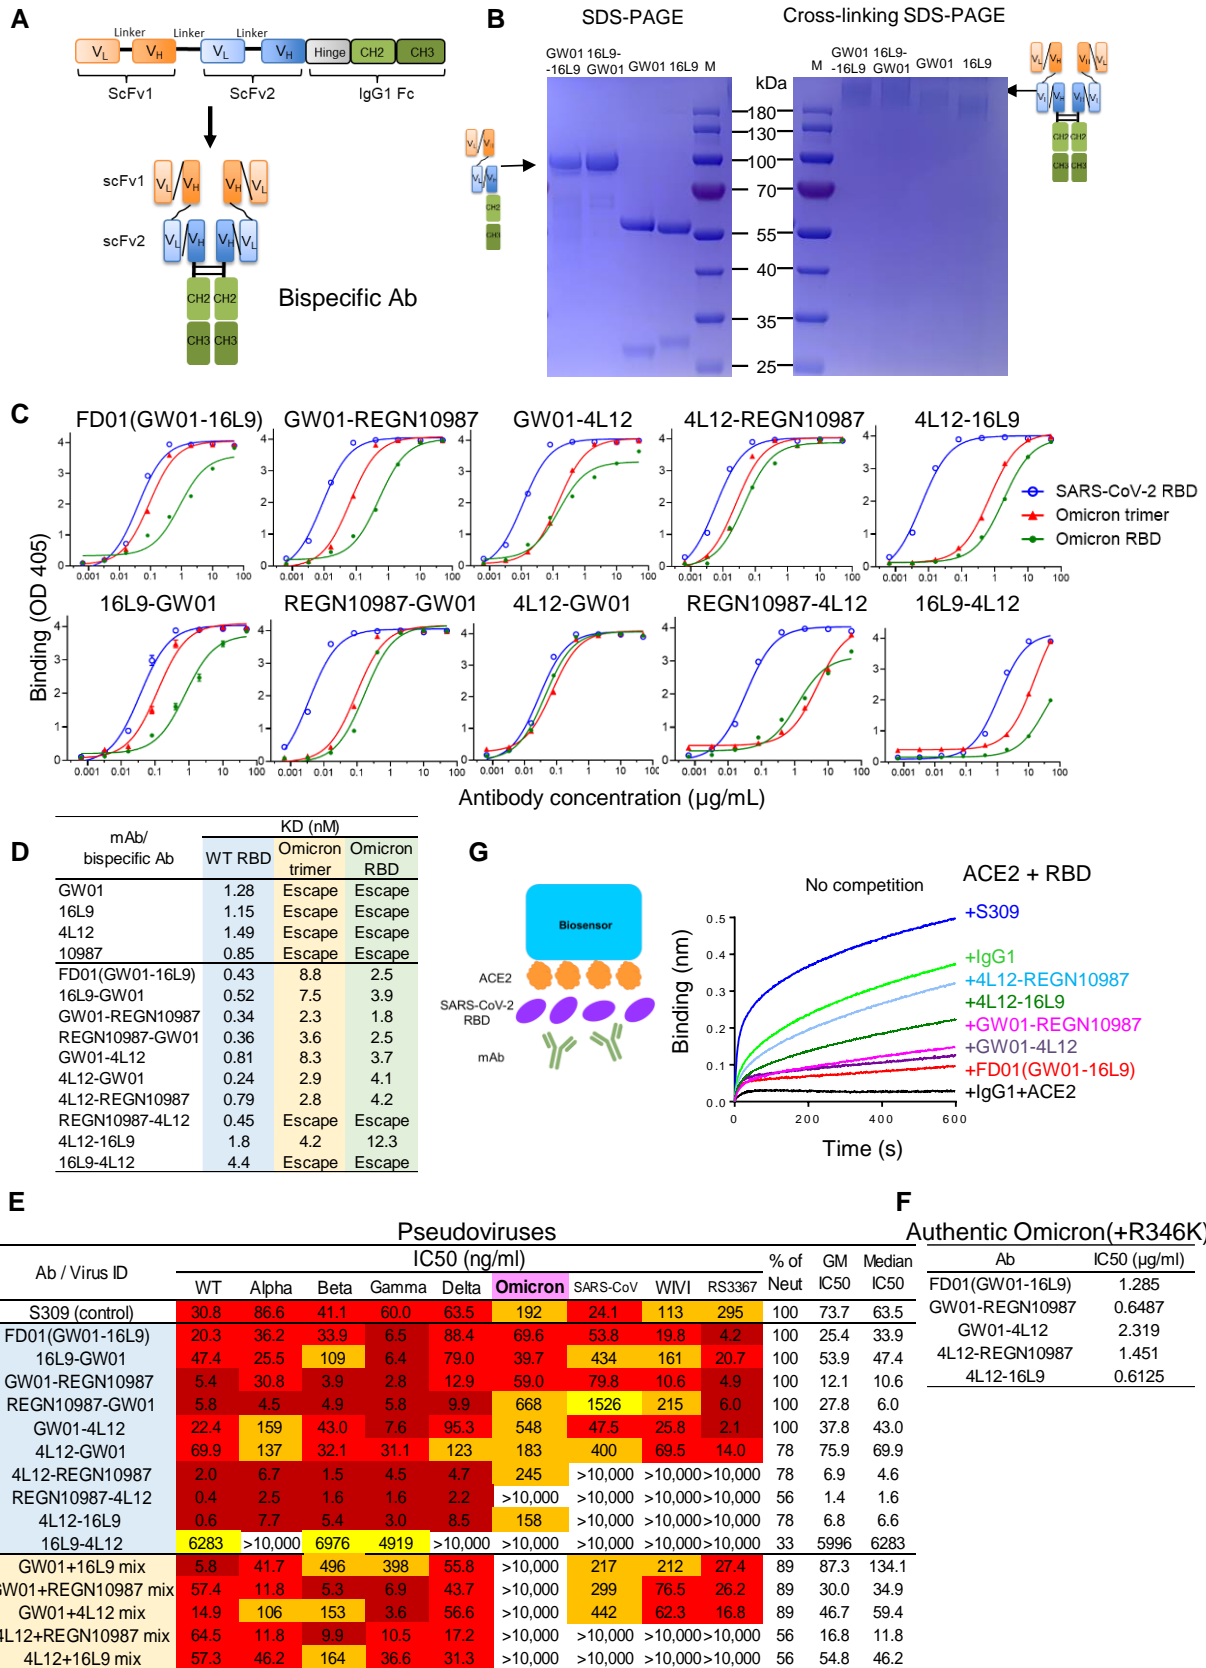

340

341

342 **Figure 2. Binding and neutralization of the Omicron variant by bispecific**  
343 **antibodies.**

344 **(A)** Schematic diagrams showing the structures of bispecific antibodies. **(B)**  
345 SDS–PAGE and cross-linking SDS–PAGE gels showing the sizes of the  
346 representative bispecific antibodies and their parental antibodies. **(C)** Binding  
347 specificities of the bispecific antibodies to the SARS-CoV-2 RBD-his, Omicron  
348 trimer-his, or RBD-his protein. **(D)** Binding affinities of the bispecific antibodies  
349 to the SARS-CoV-2 RBD-his, Omicron trimer-his, or RBD-his protein were  
350 measured by bilayer interferometry experiments. **(E)** Neutralization by bispecific  
351 antibodies and combinations of parental antibodies against the VOCs, including  
352 Omicron variant, and sarbecoviruses. **(F)** Neutralization of five representative  
353 bispecific antibodies against authentic Omicron(+R346K) variants. **(G)** Five  
354 representative bispecific antibodies bind to the ACE2-binding site and block  
355 RBD binding to ACE2. Binding of ACE2 to the SARS-CoV-2 RBD in competition  
356 with bispecific antibodies (red), S309 (blue), control IgG1 (green), and  
357 IgG1+ACE2 (black).

358

359

360

361

362

363

364

365

366

367

368

369

370

371

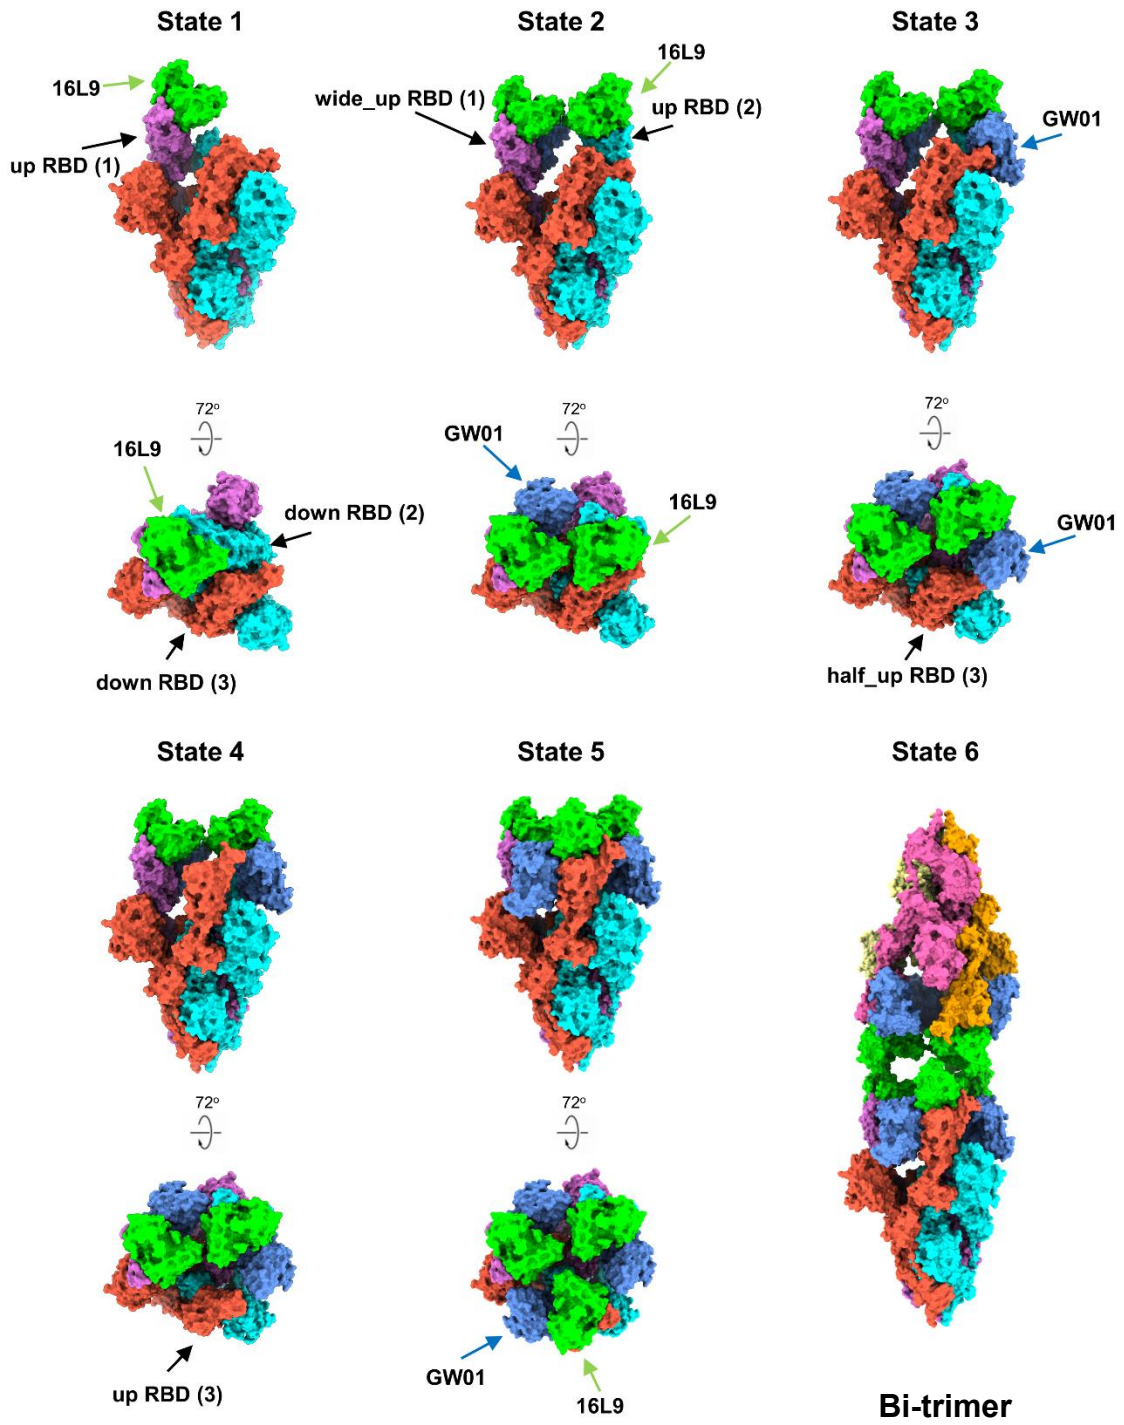

372 **Figure 3. Cryo-EM structures of the Omicron S trimer in complex with**  
373 **the bispecific antibody FD01.**

374 The bispecific antibody FD01 binds to Omicron S trimers in six states. Two  
375 perpendicular views of Omicron S-FD01 are shown in surface representation,  
376 with 16L9 ScFv in lime and GW01 ScFv in cornflower blue.  
377

378

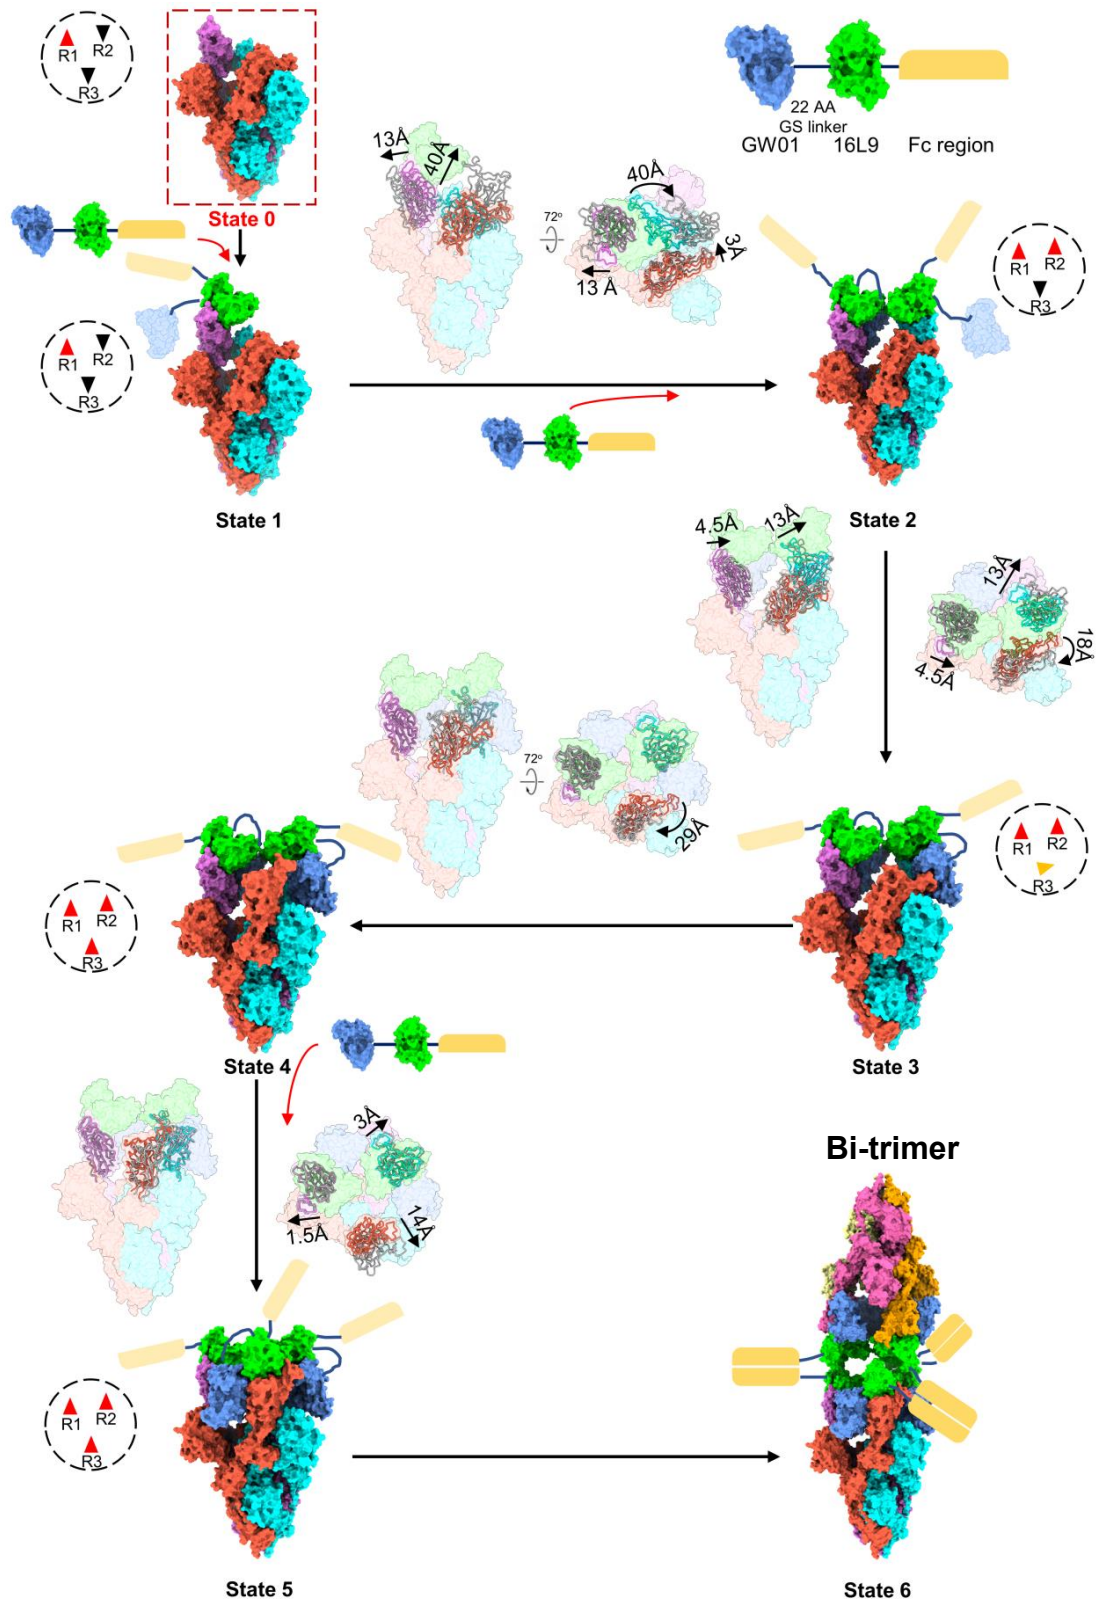

379 **Figure 4. Conformation transitions of Omicron S-FD01 in all states.**  
380 State 0 inside the red dashed box is a hypothetical apo state structure. Small  
381 triangles inside the black dashed circle indicate the up/half\_up/down states of  
382 three RBDs in the trimer.



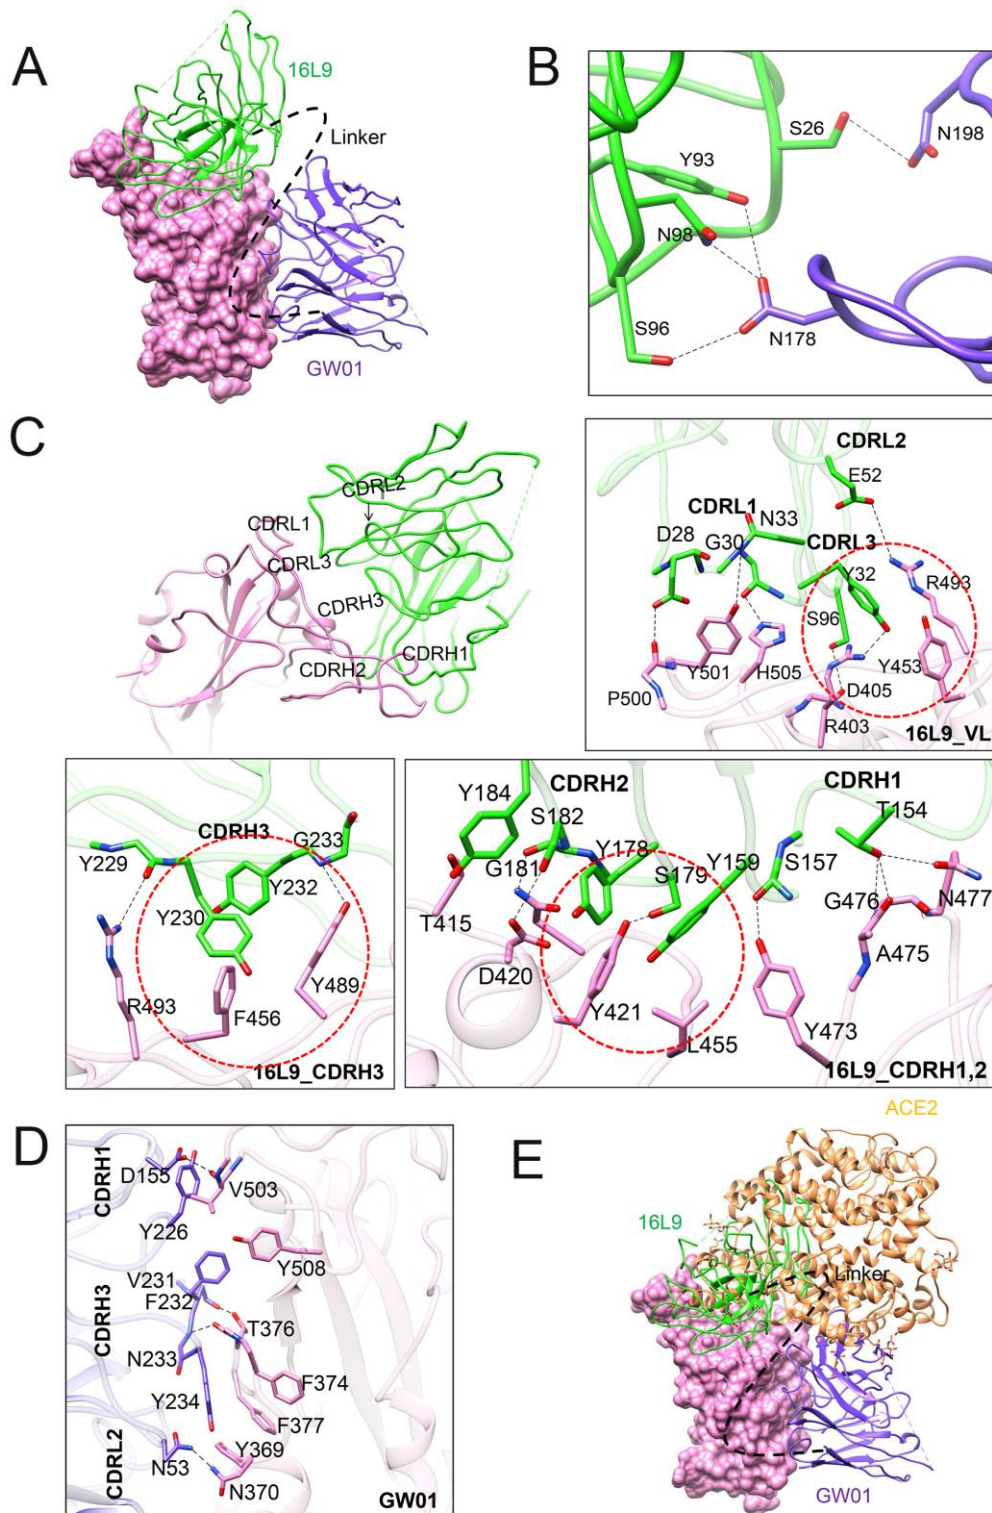

383

384



385 **Figure 5. Two conserved epitopes recognized by FD01.** (A) Close-up view  
386 of the interaction between FD01 and Omicron; the Omicron RBD is displayed  
387 in pink in surface representation. 16L9 and GW01 are shown as cartoons  
388 colored green and medium-blue, respectively. (B) The interface between 16L9  
389 and GW01. (C-D) The interaction of 16L9 (C) and GW01 (D). The residues  
390 involved in interactions are represented as sticks. Polar interactions are  
391 indicated as dotted lines. (E) Ribbon diagrams of FD01 and ACE2 (PDBID:  
392 7T9L) bound to the Omicron RBD.

393

394

395

396

397

398 **Table 1. Neutralization by GW01, 16L9, 4L12, REGN10987, and six**  
 399 **bispecific antibodies against 34 strains containing single mutations**  
 400 **present within the Omicron variant.**

| Spike | Virus ID   | IC50 fold change vs. WT |       |      |           |      |           |                |           |                |           |      |
|-------|------------|-------------------------|-------|------|-----------|------|-----------|----------------|-----------|----------------|-----------|------|
|       |            | GW01                    | 16L9  | 4L12 | REGN10987 | FD01 | 16L9-GW01 | GW01-REGN10987 | GW01-4L12 | 4L12-REGN10987 | 4L12-16L9 |      |
|       | WT         | 1.0                     | 1.0   | 1.0  | 1.0       | 1.0  | 1.0       | 1.0            | 1.0       | 1.0            | 1.0       |      |
| NTD   | A67V       | 0.7                     | 0.8   | 4.4  | 1.1       | 2.8  | 2.1       | 0.8            | 3.2       | 3.3            | 31.3      |      |
|       | Δ69-70     | 0.6                     | 1.3   | 2.5  | 1.9       | 2.3  | 2.6       | 4.9            | 3.9       | 4.5            | 2.8       |      |
|       | T95I       | 1.4                     | 1.9   | 2.5  | 1.1       | 1.3  | 2.0       | 1.9            | 2.4       | 3.3            | 0.8       |      |
|       | G142D      | 3.2                     | 4.8   | 0.7  | 3.4       | 2.5  | 1.2       | 21.1           | 1.6       | 0.8            | 5.0       |      |
|       | Δ143-145   | 0.1                     | 2.4   | 0.9  | 0.7       | 1.3  | 0.2       | 0.2            | 1.3       | 0.6            | 1.6       |      |
|       | Δ211       | 0.5                     | 0.8   | 9.5  | 5.2       | 3.8  | 0.5       | 3.3            | 0.8       | 0.4            | 1.4       |      |
|       | L212I      | 0.6                     | 1.1   | 1.3  | 2.1       | 3.7  | 2.1       | 1.5            | 7.0       | 5.3            | 5.0       |      |
|       | ins214EPE  | 6.4                     | 3.2   | 6.7  | 0.9       | 3.9  | 1.1       | 1.9            | 3.1       | 5.3            | 0.3       |      |
|       | G339D      | 1.0                     | 0.7   | 4.1  | 0.5       | 1.6  | 0.7       | 1.1            | 0.8       | 32.8           | 3.1       |      |
|       | RBD<br>RBM | S371I                   | 80.0  | 1.3  | 116.5     | 74.1 | 12.4      | 14.4           | 2.6       | 1.2            | 25.4      | 15.6 |
| S373P |            | 4.8                     | 6.4   | 2.8  | 5.9       | 0.9  | 0.1       | 6.0            | 10.7      | 0.3            | 2.8       |      |
| S375F |            | 16.0                    | 3.2   | n.t. | >1000     | 1.2  | n.t.      | n.t.           | n.t.      | n.t.           | n.t.      |      |
| K417N |            | 3.9                     | >1000 | 0.3  | 1.7       | 1.7  | 1.6       | 4.3            | 3.8       | 5.8            | 4.4       |      |
| N440K |            | 2.3                     | 7.3   | 3.5  | >1000     | 3.8  | 1.1       | 1.1            | 2.6       | 0.9            | 1.0       |      |
| G446S |            | 1.1                     | 1.1   | 9.1  | >1000     | 1.8  | 1.6       | 0.5            | 2.5       | 0.9            | 0.8       |      |
| S477N |            | 4.1                     | 1.4   | 16.0 | 0.9       | 2.2  | 2.1       | 3.7            | 8.9       | 3.1            | 4.1       |      |
| T478K |            | 1.5                     | 2.3   | 4.5  | 1.0       | 2.2  | 2.7       | 2.8            | 5.5       | 2.4            | 1.6       |      |
| E484A |            | 0.5                     | 3.0   | 2.5  | 1.4       | 4.2  | 1.3       | 1.4            | 3.9       | 1.0            | 0.9       |      |
| Q493R |            | 1.0                     | 0.6   | 8.1  | 0.9       | 1.9  | 1.9       | 4.6            | 8.3       | 0.7            | 1.1       |      |
| G496S |            | 1.6                     | 3.5   | 9.4  | 4.7       | 0.8  | 2.7       | 2.4            | 5.8       | 2.7            | 1.4       |      |
| Q498R |            | 0.4                     | 0.8   | 4.8  | 0.9       | 2.5  | 0.5       | 2.2            | 0.6       | 0.4            | 1.4       |      |
| N501Y |            | 0.6                     | 2.5   | 20.3 | 3.2       | 2.9  | 2.0       | 3.3            | 6.9       | 1.0            | 2.1       |      |
| Y505H |            | 0.2                     | 1.0   | 19.3 | 0.2       | 7.9  | 2.9       | 6.4            | 1.7       | 0.7            | 0.9       |      |
| SD1   |            | T547K                   | 0.6   | 6.4  | 4.8       | 0.2  | 2.5       | 0.8            | 0.6       | 2.1            | 0.9       | 0.4  |
| SD2   |            | D614G                   | 2.4   | 1.8  | 4.6       | 1.5  | 2.3       | 1.1            | 2.3       | 3.6            | 3.4       | 1.2  |
|       |            | H655Y                   | 4.0   | 2.1  | 6.2       | 0.6  | 0.7       | 3.1            | 4.6       | 9.1            | 5.6       | 2.7  |
|       |            | N679K                   | 3.2   | 1.9  | 8.6       | 0.8  | 2.5       | 6.8            | 6.6       | 14.0           | 3.5       | 4.3  |
|       | P681H      | 4.8                     | 3.5   | 3.8  | 1.4       | 3.7  | 0.9       | 0.5            | 0.6       | 0.7            | 1.0       |      |
| FP    | N764K      | 1.5                     | 1.3   | 7.2  | 1.1       | 2.0  | 5.0       | 11.4           | 10.3      | 4.0            | 3.3       |      |
|       | D796Y      | 6.4                     | 0.7   | 8.2  | 0.5       | 1.9  | 5.0       | 2.2            | 8.4       | 4.0            | 3.3       |      |
| HR1   | N856K      | 9.5                     | 1.9   | 8.1  | 0.7       | 0.7  | 1.3       | 1.5            | 4.9       | 1.6            | 1.5       |      |
|       | Q954H      | 0.7                     | 0.8   | 3.0  | 1.1       | 2.8  | 2.2       | 2.7            | 4.5       | 1.5            | 1.2       |      |
|       | N969K      | 9.5                     | 8.7   | n.t. | 5.9       | 2.4  | n.t.      | n.t.           | n.t.      | n.t.           | n.t.      |      |
|       | L981F      | 0.5                     | 1.7   | 0.7  | 0.2       | 2.5  | 0.2       | 1.6            | 0.4       | 1.7            | 5.3       |      |

401 Fold change is defined as the IC50 of the mutant/the IC50 of the WT. Mutants that resulted  
 402 in fold change values between 10-50 are highlighted in yellow, and those with values >50  
 403 are highlighted in red. The S375F and N969K pseudoviruses were not available to some  
 404 of the antibodies and are labeled as not tested "n.t."

405

406

407

## 408 **Materials and Methods**

### 409 **Cell lines, proteins, viruses and plasmids**

410 The human primary embryonic kidney cell lines (HEK293T) and 293T-hACE2  
411 cells were cultured in DMEM medium with 10% fetal bovine serum (FBS). RBD-  
412 his proteins of SARS-CoV-2 and Omicron variant were purchased from Sino  
413 Biological. Genes of bispecific antibodies were synthesized by Genscript. The  
414 authentic Omicron (B.1.1.529) with R346K mutation used in this study were  
415 isolated from COVID-19 patients in Guangzhou, passaged, and titered on Vero  
416 E6 cells. African green monkey kidney-derived Vero E6 cells were grown in  
417 Dulbecco's modified Eagle's medium (DMEM; Gibco, Grand Island, NY, USA)  
418 supplemented with 10% fetal bovine serum (FBS). All work with authentic  
419 SARS-CoV-2 was conducted at the Guangzhou Customs Technology Center  
420 Biosafety Level 3 (BSL-3) Laboratory.

### 421 **Production of Pseudoviruses**

422 S genes of SARS-CoV-2 (NC\_045512), Alpha (containing 69–70 and 144  
423 deletions and N501Y, A570D, D614G, P681H, T716I, S982A, and D1118H  
424 substitutions), Beta (containing D80A, D215G, 241-243 deletions and K417N,  
425 E484K, N501Y, D614G and A701V substitutions), Gamma (containing  
426 L18F,T20N,P26S,D138Y,R190S,K417T,E484K,N501Y,D614G.H655Y,T1027I,  
427 and V1176F substitutions), Delta (containing T19R, 157-158 deletions and  
428 L452R, T478K, D614G, P681R and D950N substitutions), and Omicron  
429 (containing A67V, 69-70del, T95I, G142D, 143-145del, N211I, 212del,  
430 ins215EPE, G339D, S371L, S373P, S375F, K417N, N440K, G446S, S477N,  
431 T478K, E484A, Q493R, G496S, Q498R, N501Y, Y505H, T547K, D614G,  
432 H655Y, N679K, P681H, N764K, D796Y, N856K, Q954H, N969K, L981F  
433 substitutions), SARS-CoV, bat SARSr-CoVs (WIV1 and Rs3367) were  
434 synthesized by BGI and constructed in pcDNA3.1 vector. Pseudoviruses were  
435 generated by co-transfection of 293T cells with an env-deficient HIV backbone  
436 pNL4-3.Luc.R-E- backbone and a spike expressing vector<sup>16,17</sup>. Fifty additional

437 spike variants carrying currently circulating single-point mutations were  
438 constructed by site-directed mutagenesis.

#### 439 **Neutralization assay**

440 The neutralization activities of mAbs and bispecific antibodies were determined  
441 using a single-round pseudovirus infection of 293T-hACE2 cells. 10 µl of 5-fold  
442 serially diluted antibody was incubated with 40 µl of pseudovirus in 96-well plate  
443 at 37 °C for 1 h. 10<sup>4</sup> 293T-hACE2 cells were then added to the mixture and  
444 cultured for 48 h at 37 °C. Cells were lysed and firefly luciferase activity were  
445 developed with a luciferase assay system (Promega) and detected on a  
446 luminometer (Perkin Elmer). The IC<sub>50</sub>s of NAbs were  
447 calculated using the GraphPad Prism 7.04 software (La Jolla, CA, USA).

#### 448 **Memory B-cell staining, sorting and antibody cloning**

449 CD19+IgA-IgD-IgM- primary B cells were sorted out from peripheral blood  
450 mononuclear cells (PBMC) of recovered patients of COVID-19 and expanded  
451 *in vitro* in MEM medium with 10% FBS in the presence of irradiated 3T3-  
452 msCD40L feeder cells, IL-2 and IL-21 as previously described<sup>18</sup>. After fifteen  
453 days of incubation, supernatants were screened for neutralization against  
454 SARS-CoV-2. From the wells with SARS-CoV-2 neutralization activities, the  
455 variable regions of the antibody (VH and VL) genes were amplified by RT-PCR.  
456 mAbs were expressed as human IgG1 by HEK293F cells and purified using a  
457 protein G column (Smart-Lifesciences).

#### 458 **ELISA**

459 2 µg/ml of SARS-CoV-2 RBD-his, Omicron trimer-his, and Omicron RBD-his  
460 protein were coated overnight at 4 °C in a 96-well plate (MaxiSorp Nunc-  
461 immuno, Thermo Scientific, USA). Wells were blocked with 5% non-fat milk  
462 (Biofroxx, Germany) in PBS for 1 hour at room temperature, followed by  
463 incubation with 5-fold serially diluted mAb in disruption buffer (PBS, 5% FBS,  
464 2% BSA, and 1% Tween-20) for 1 hour at room temperature. After 3 washing

465 steps with PBS 0.05% Tween 20 (PBS-T), 1:2500 diluted HRP-conjugated goat  
466 anti-human IgG antibody (Jackson Immuno Research Laboratories, USA) was  
467 added for 1 hour at room temperature. Plates were washed three times with  
468 0.2% Tween-20 in PBS and developed using ABST (Thermo Scientific, USA)  
469 for 30 minutes. Absorbance at 405 nm was read on a Multiskan FC plate reader  
470 (Thermo Scientific, USA).

#### 471 **Biolayer interferometry (BLI) binding assay and competition assay**

472 Experiments were carried out on a FortéBio OctetRED96 instrument. The  
473 kinetics of monoclonal antibody binding to SARS-CoV-2 RBD-his, Omicron  
474 RBD-his, or trimer-his proteins was measured using anti-human IgG (AHC)  
475 biosensors. 10 µg/ml of mAbs were immobilized on biosensors for 200s. After  
476 a 120 sec stabilization step with 0.02% PBST (PBS with 0.02% Tween),  
477 biosensors were moved into 6 µg/ml of RBD-his or trimer-his proteins for the  
478 300 sec association step. Then biosensors were moved into 0.02% PBST to  
479 detect dissociation for 300 sec. The buffer control binding was subtracted to  
480 deduct nonspecific binding.  $K_{on}$ ,  $K_{off}$ , and  $K_D$  were calculated by FortéBio Data  
481 Analysis software (Version 8.1) using 1:1 binding and a global fitting model.

482 For the Ab competition assay, 10 µg/ml of mAbs 1 were immobilized on the anti-  
483 human IgG (AHC) biosensors for 200s. After wash with 0.02% PBST for 120s  
484 to reach baseline, biosensors were moved into 50 µg/ml of IgG1 isotype control  
485 for 200s and then moved into SARS-CoV-2 RBD at 6 µg/ml for 300s. After wash  
486 with 0.02% PBST for 120s, biosensors were moved into 10 µg/ml of mAb2 for  
487 600s to detect the association between mAb2 and SARS-CoV-2 RBD.

488 For ACE2 competition, biosensors were moved into 20 µg/ml of ACE2-Fc for  
489 600s. After baseline, wash, and blocking steps, biosensors were moved into  
490 pre-mix of 600 nM of mAb and 100 nM SARS-CoV-2 RBD for 600s. A mixture  
491 of ACE2-Fc and SARS-CoV-2 RBD was used as a positive control, while the

492 mixture of IgG1 isotype control and SARS-CoV-2 RBD was used as a negative  
493 control.

#### 494 **Focus reduction neutralization test**

495 SARS-CoV-2 Omicron(+R346K) focus reduction neutralization test (FRNT) was  
496 performed in a certified Biosafety level 3 lab. Fifty microliters antibody were  
497 serially diluted, mixed with 50  $\mu$ l of SARS-CoV-2 (100 focus forming unit, FFU)  
498 in 96-well microwell plates and incubated for 1 hour at 37°C. Mixtures were then  
499 transferred to 96-well plates seeded with Vero E6 cells (ATCC, Manassas, VA)  
500 for 1 hour at 37°C to allow virus entry. Inoculums were then removed before  
501 adding the overlay media (100  $\mu$ l MEM containing 1.2%  
502 Carboxymethylcellulose, CMC). After 24-hour post infection, the overlay was  
503 discarded and the cell monolayer was fixed with 4% paraformaldehyde solution  
504 for 2 hours at RT. After permeabilized with 0.2% Triton X-100 for 20 min at room  
505 temperature, the plates were sequentially stained with cross-reactive rabbit  
506 anti-SARS-CoV-2 N IgG (Cat. No.: 40143-T62, Sino Biological Inc) as the  
507 primary antibody and HRP-conjugated goat anti-rabbit IgG(H+L) (No.: 109-035-  
508 088, Jackson ImmunoResearch) as the secondary antibody in 37°C for 1 hour  
509 respectively. The reactions were developed with KPL TrueBlue Peroxidase  
510 substrates. The numbers of SARS-CoV-2 foci were calculated using CTL  
511 ImmunoSpot S6 Ultra reader (Cellular Technology Ltd). Neutralizing activity  
512 was defined as the ratio of inhibition of SARS-CoV-2 focus comparing diluted  
513 antibody to control.

#### 514 **Construction and expression of bispecific NAb**

515 Genes of a bispecific Ab consisting of the scFv of GW01 and scFv of 16L9,  
516 REGN10987 or 4L12 were synthesized and codon-optimized by GenScript. The  
517 bispecific antibody sequence alignment was as follows: variable light chain (VL)  
518 and variable heavy chain (VH) of mAb 1 or mAb 2 were linked with a (Gly<sub>4</sub>Ser)<sub>3</sub>  
519 linker. VL-VH of mAb 1 and VL-VH of mAb 2 were linked with a (Gly<sub>4</sub>Ser)<sub>4</sub> linker  
520 and then fused to the expression vector with hinge-CH2-CH3 fragment of

521 human immunoglobulin (hlgG1 Fc). FD01 bispecific antibody sequence order  
522 was as follows: GW01 VL-(Gly<sub>4</sub>Ser)<sub>3</sub>-GW01 VH-(Gly<sub>4</sub>Ser)<sub>4</sub>-16L9 VL-(Gly<sub>4</sub>Ser)<sub>3</sub>-  
523 16L9 VH-hinge-CH2-CH3.

524 293F cells were transiently transfected with bispecific Abs plasmid. After 6 days  
525 of culture at 37°C in a 5% CO<sub>2</sub> incubator, supernatant was collected and filtered.  
526 Bispecific antibodies were purified with protein G colume (Smart-Lifesciences)  
527 and stored in PBS at -80°C.

### 528 **SDS-PAGE and cross-linking SDS-PAGE of bispecific antibodies**

529 The purity and molecular weight of bispecific antibodies were then analyzed by  
530 SDS-PAGE and cross-linking SDS-PAGE. Briefly, 5 µg of bispecific antibodies  
531 were mixed with 5x SDS-loading sample buffer containing 10% β-  
532 mercaptoethanol. The samples were heated for 10 min at 100°C and were then  
533 loaded on an SDS gradient gel (4–20% Precast Protein Improve Gels,  
534 Genscript Biotech Corporation). The gel was run for 120 min at 120 V, and  
535 Coomassie staining was performed.

536 Extent of dimer was investigated by cross-linking of bispecific antibodies with  
537 glutaraldehyde (Sigma-Aldrich). Briefly, 5 µg of antibodies were diluted in 25 µl  
538 of PBS in the presence of a 2.7 µM of glutaraldehyde cross-linker. The mixture  
539 was incubated at RT for 5 minutes, and then glutaraldehyde was quenched by  
540 adding 1 M Tris-HCl buffer (pH 8.0) to a final concentration of 40 mM. After  
541 mixing with 5x SDS-loading sample, the protein samples were loaded on a 4-  
542 20% SDS gradient gel. The gel was run for 180 min at 120 V and confirmed by  
543 Coomassie staining.

### 544 **Expression and purification of SARS-CoV-2 Omicron Spike**

545 The Human codon gene encoding SARS-CoV-2 Omicron S ectodomain was  
546 purchased from GeneScript. The expression plasmid of Omicron S 6P  
547 substitution<sup>19</sup> was constructed and transfected into suspension HEK293F using  
548 polyethlenimine. After 72 hours, the supernatants were harvested and filtered



549 for affinity purification by Histrap HP (GE). The protein was then further purified  
550 by gel filtration using Superose 6 increase 10/300 column (GE Healthcare) in  
551 20 mM Tris pH 8.0, 200 mM NaCl.

### 552 **Cryo-EM sample preparation**

553 Purified SARS-CoV-2 Omicron S at 1.554 mg/mL was mixed with FD01  
554 antibody by a molar ratio of 1:1.5 incubated for 10 min on ice before application  
555 onto a freshly glow-discharged holey amorphous nickel-titanium alloy film  
556 supported by 400 mesh gold grids<sup>20</sup>. The sample was plunged freezing in liquid  
557 ethane using Vitrobot IV (FEI/Thermo Fisher Scientific), with 2 s blot time and -  
558 3 blot force and 10 s wait time.

### 559 **Cryo-EM data collection and image processing**

560 Cryo-EM data were collected on a Titan Krios microscope (Thermo Fisher)  
561 operated at 300 kV, equipped with a K3 summit direct detector (Gatan) and a  
562 GIF quantum energy filter (Gatan) setting to a slit width of 20 eV. Automated  
563 data acquisition was carried out with SerialEM software<sup>21</sup> through beam-image  
564 shift method<sup>22</sup>.

565 Movies were taken in the super-resolution mode at a nominal magnification  
566 81,000 $\times$ , corresponding to a physical pixel size of 1.064 Å, and a defocus range  
567 from -1.2  $\mu$ m to -2.5  $\mu$ m. Each movie stack was dose-fractionated to 40 frames  
568 with a total exposure dose of about 58 e<sup>-</sup>/Å<sup>2</sup> and exposure time of 3s.

569 All the data processing was carried out using either modules on, or through,  
570 RELION v3.0<sup>23</sup> and cryoSPARC<sup>24</sup>. A total of 4,363 movie stacks was binned  
571 2  $\times$  2, dose weighted, and motion corrected using MotionCor2<sup>25</sup> within RELION.  
572 Parameters of contrast transfer function (CTF) were estimated by using Gctf<sup>26</sup>.  
573 All micrographs then were manually selected for further particle picking upon  
574 ice condition, defocus range and estimated resolution.

575 Remaining 3,817 good images were imported into cryoSPARC for further  
576 patched CTF-estimating, blob-picking and 2D classification. From 2D  
577 classification, bi-trimer and trimer particles were observed. Several good 2D  
578 classes of these two kind particles were used as templates for template-picking

579 separately. After 2D classification of particles from template-picking was  
580 finished, all good particles from blob-picking and template-picking were merged  
581 and deduplicated, subsequently being exported back to RELION through pyem  
582 package <sup>27</sup>.

583 For bi-trimer map, 1,003,956 particles were extracted at a box-size of 540 and  
584 rescaled to 180, then carried on 2 round of 3D classification with a soft circular  
585 mask of 480 Å in diameter in RELION. Only good classes were selected,  
586 yielding 166,441 clean particles. These particles were re-extracted unbinned  
587 (1.064 Å/pixel) and auto-refined without applying symmetry, yielding a map at  
588 6.11 Å.

589 For trimer map, 1,003,956 particles were extracted at a box-size of 320 and  
590 rescaled to 160, then carried on 1 round of 3D classification with a soft circular  
591 mask of 220 Å in diameter in RELION. Three classes with different conformation  
592 change on trimer RBDs were selected separately for another round of 3D  
593 classification. Particles in different states were auto-refined, CTF-refined and  
594 polished separately. Some density of RBDs and Fabs in some state were not  
595 well-resolved, so we carried out no-alignment 3D classification with NTD-RBD-  
596 Fabs (NRF) mask to improve those regions. Finally, we got 5 states of Omicron  
597 S-FD01 trimer.

598 To get clear interfaces of RBD with Fabs, we did local-refinement focused on  
599 that region. We first selected all good 3D-classes with relatively complete RBD  
600 and FD01 density within all states. We auto-refined these particles with a C3-  
601 aligned reference, but the auto-refinement procedure was not applied any  
602 symmetry. Then particles were expanded with C3 symmetry and further  
603 subtracted with one NRF mask. After no-alignment 3D-classification, 249,122  
604 particles with complete NRF density were selected out, exported to cryoSPARC  
605 and carried out local refinement, yielding a local-refined map at 3.51 Å.

606 The reported resolutions above are based on the gold-standard Fourier shell  
607 correlation (FSC) 0.143 criterion. All the visualization and evaluation of 3D  
608 density maps were performed with UCSF Chimera <sup>28</sup> and ChimeraX<sup>29</sup>. The

609 above procedures of data processing are summarized in Fig. S3 and Fig. S4.  
610 These sharpened maps were generated by DeepEMhancer<sup>30</sup> and then “vop  
611 zflip” to get the correct handedness in UCSF Chimera for subsequent model  
612 building and analysis.

### 613 **Model building and refinement**

614 For model building of SARS-CoV-2 Omicron S FD01 complex, the SARS-CoV-  
615 2 Omicron S trimer model and the antibody model generated by swiss-model<sup>31</sup>  
616 were fitted into the map using UCSF Chimera and then manually adjusted with  
617 COOT<sup>32</sup>. Several iterative rounds of real-space refinement were further carried  
618 out in PHENIX<sup>33</sup>. The RBD bounded with 16L9 and GW01 was refined against  
619 the local refinement map and then docked back into global refinement trimer  
620 and bi-trimer maps. Model validation was performed using phenix.MolProbity.  
621 Figures were prepared using UCSF Chimera and UCSF ChimeraX<sup>29</sup>.

622 **Data and materials availability:** The cryo-EM map and the coordinates of  
623 SARS-CoV-2 Omicron S complexed with FD01 have been deposited to the  
624 Electron Microscopy Data Bank (EMDB) and Protein Data Bank (PDB) with  
625 accession numbers EMD-32655 and PDB 7WOQ (state 1), EMD-32656 and  
626 PDB 7WOR (state 2), EMD-32657 and PDB 7WOS (state 3), EMD-32659 and  
627 PDB 7WOU (state 4), EMD-32660 and PDB 7WOV (state 5), EMD-32661 and  
628 PDB 7WOW (state 6), EMD-32654 and PDB 7WOP (NTD-RBD-GW01-16L9  
629 local refinement).

630

### 631 **REFERENCES**

- 632 1 Cameroni, E. *et al.* Broadly neutralizing antibodies overcome SARS-CoV-2 Omicron  
633 antigenic shift. *Nature*, doi:10.1038/s41586-021-04386-2 (2021).
- 634 2 Cele, S. *et al.* Omicron extensively but incompletely escapes Pfizer BNT162b2  
635 neutralization. *Nature*, doi:10.1038/s41586-021-04387-1 (2021).
- 636 3 Liu, L. *et al.* Striking Antibody Evasion Manifested by the Omicron Variant of SARS-CoV-  
637 2. *Nature*, doi:10.1038/s41586-021-04388-0 (2021).
- 638 4 Planas, D. *et al.* Considerable escape of SARS-CoV-2 Omicron to antibody neutralization.

- 639 *Nature*, doi:10.1038/s41586-021-04389-z (2021).
- 640 5 Rössler, A. *et al.* SARS-CoV-2 Omicron Variant Neutralization in Serum from Vaccinated  
641 and Convalescent Persons. doi:10.1056/NEJMc2119236 (2022).
- 642 6 Carreño, J. M. *et al.* Activity of convalescent and vaccine serum against SARS-CoV-2  
643 Omicron. *Nature*, doi:10.1038/s41586-022-04399-5 (2021).
- 644 7 Garcia-Beltran, W. F. *et al.* mRNA-based COVID-19 vaccine boosters induce neutralizing  
645 immunity against SARS-CoV-2 Omicron variant. *Cell*, doi:10.1016/j.cell.2021.12.033  
646 (2022).
- 647 8 Dejnirattisai, W. *et al.* Reduced neutralisation of SARS-CoV-2 omicron B.1.1.529 variant  
648 by post-immunisation serum. *Lancet* **399**, 234-236, doi:10.1016/s0140-6736(21)02844-0  
649 (2022).
- 650 9 Wang, Y. *et al.* Resistance of SARS-CoV-2 Omicron Variant to Convalescent and  
651 CoronaVac Vaccine Plasma. *Emerg Microbes Infect*, 1-8,  
652 doi:10.1080/22221751.2022.2027219 (2022).
- 653 10 Wang, Y. *et al.* The significant immune escape of pseudotyped SARS-CoV-2 variant  
654 Omicron. *Emerg Microbes Infect* **11**, 1-5, doi:10.1080/22221751.2021.2017757 (2022).
- 655 11 Dejnirattisai, W. *et al.* Omicron-B.1.1.529 leads to widespread escape from neutralizing  
656 antibody responses. *bioRxiv*, doi:10.1101/2021.12.03.471045 (2021).
- 657 12 Zhou, T. *et al.* Structural basis for potent antibody neutralization of SARS-CoV-2 variants  
658 including B.1.1.529. 2021.2012.2027.474307, doi:10.1101/2021.12.27.474307 %J bioRxiv  
659 (2021).
- 660 13 VanBlargan, L. A. *et al.* An infectious SARS-CoV-2 B.1.1.529 Omicron virus escapes  
661 neutralization by therapeutic monoclonal antibodies. *Nature Medicine*,  
662 doi:10.1038/s41591-021-01678-y (2022).
- 663 14 Mannar, D. *et al.* Structural analysis of receptor binding domain mutations in SARS-CoV-  
664 2 variants of concern that modulate ACE2 and antibody binding. *Cell Rep* **37**, 110156,  
665 doi:10.1016/j.celrep.2021.110156 (2021).
- 666 15 Cao, Y. *et al.* Omicron escapes the majority of existing SARS-CoV-2 neutralizing  
667 antibodies. *Nature*, doi:10.1038/s41586-021-04385-3 (2021).
- 668 16 Ju, B. *et al.* Human neutralizing antibodies elicited by SARS-CoV-2 infection. *Nature* **584**,  
669 115-119, doi:10.1038/s41586-020-2380-z (2020).
- 670 17 Wu, F. *et al.* Evaluating the Association of Clinical Characteristics With Neutralizing  
671 Antibody Levels in Patients Who Have Recovered From Mild COVID-19 in Shanghai, China.  
672 *JAMA internal medicine* **180**, 1356-1362, doi:10.1001/jamainternmed.2020.4616 (2020).
- 673 18 Huang, J. *et al.* Isolation of human monoclonal antibodies from peripheral blood B cells.  
674 *Nat Protoc* **8**, 1907-1915, doi:10.1038/nprot.2013.117 (2013).
- 675 19 Hsieh, C. L. *et al.* Structure-based design of prefusion-stabilized SARS-CoV-2 spikes.  
676 *Science* **369**, 1501-1505, doi:10.1126/science.abd0826 (2020).
- 677 20 Huang, X. *et al.* Amorphous nickel titanium alloy film: A new choice for cryo electron  
678 microscopy sample preparation. *Prog Biophys Mol Biol* **156**, 3-13,  
679 doi:10.1016/j.pbiomolbio.2020.07.009 (2020).
- 680 21 Mastronarde, D. N. Automated electron microscope tomography using robust prediction  
681 of specimen movements. *J Struct Biol* **152**, 36-51, doi:10.1016/j.jsb.2005.07.007 (2005).
- 682 22 Wu, C. *et al.* High-quality, high-throughput cryo-electron microscopy data collection via

- 683 beam tilt and astigmatism-free beam-image shift. *Journal of structural biology* **208**,  
684 107396, doi:10.1016/j.jsb.2019.09.013 (2019).
- 685 23 Zivanov, J. *et al.* New tools for automated high-resolution cryo-EM structure  
686 determination in RELION-3. *Elife* **7**, doi:10.7554/eLife.42166 (2018).
- 687 24 Punjani, A. *et al.* M. A. cryoSPARC: algorithms for rapid unsupervised cryo-EM structure  
688 determination. *Nature methods* **14**, 290-296, doi:10.1038/nmeth.4169 (2017).
- 689 25 Zheng, S. Q. *et al.* MotionCor2: anisotropic correction of beam-induced motion for  
690 improved cryo-electron microscopy. *Nat Methods* **14**, 331-332, doi:10.1038/nmeth.4193  
691 (2017).
- 692 26 Zhang, K. Gctf: Real-time CTF determination and correction. *J Struct Biol* **193**, 1-12,  
693 doi:10.1016/j.jsb.2015.11.003 (2016).
- 694 27 Asarnow, D., Palovcak, E., Cheng, Y. UCSF pyem v0.5. Zenodo  
695 <https://doi.org/10.5281/zenodo.3576630> (2019).  
696 doi:<https://doi.org/10.5281/zenodo.3576630> (2019).
- 697 28 Pettersen, E. F. *et al.* UCSF Chimera--a visualization system for exploratory research and  
698 analysis. *J Comput Chem* **25**, 1605-1612, doi:10.1002/jcc.20084 (2004).
- 699 29 Pettersen, E. F. *et al.* UCSF ChimeraX: Structure visualization for researchers, educators,  
700 and developers. *Protein Sci* **30**, 70-82, doi:10.1002/pro.3943 (2021).
- 701 30 Sanchez-Garcia, R. *et al.* DeepEMhancer: a deep learning solution for cryo-EM volume  
702 post-processing. *Commun Biol* **4**, 874, doi:10.1038/s42003-021-02399-1 (2021).
- 703 31 Waterhouse, A. *et al.* SWISS-MODEL: homology modelling of protein structures and  
704 complexes. *Nucleic Acids Res* **46**, W296-W303, doi:10.1093/nar/gky427 (2018).
- 705 32 Emsley, P., Lohkamp, B., Scott, W. G. & Cowtan, K. Features and development of Coot.  
706 *Acta Crystallogr D Biol Crystallogr* **66**, 486-501, doi:10.1107/S0907444910007493 (2010).
- 707 33 Afonine, P. V. *et al.* Real-space refinement in PHENIX for cryo-EM and crystallography.  
708 *Acta Crystallogr D Struct Biol* **74**, 531-544, doi:10.1107/S2059798318006551 (2018).

709 **Table S1. The germline and CDRH3 sequences of GW01, 4L12, and 16L9.**

| Donor ID | mAb ID | VH       | CDRH3 sequence       | VL       | CDRL3 sequence |
|----------|--------|----------|----------------------|----------|----------------|
| Donor 1  | GW01   | IGHV3-43 | AKDRSYGPPDVFNYEYGMDV | IGLV1-44 | AAWDDSLNWW     |
| Donor 1  | 4L12   | IGHV3-66 | ARDLITYGMDV          | IGKV1-9  | QQLNSYPPLT     |
| Donor 2  | 16L9   | IGHV3-53 | ARGEIQPYYYGMDV       | IGLV2-8  | SSYAGSSNFDV    |

710

711 **Table S2. Cryo-EM data collection and refinement statistics.**

|                                                     | State<br>1 | State<br>2 | State<br>3 | State 4      | State<br>5 | State<br>6 | Local<br>refine<br>NRF |
|-----------------------------------------------------|------------|------------|------------|--------------|------------|------------|------------------------|
| <b>Data collection and processing</b>               |            |            |            |              |            |            |                        |
| Magnification                                       |            |            |            | 81,000       |            |            |                        |
| Voltage (kV)                                        |            |            |            | 300          |            |            |                        |
| Electron exposure (e <sup>-</sup> /Å <sup>2</sup> ) |            |            |            | 58           |            |            |                        |
| Defocus range (μm)                                  |            |            |            | -1.2 to -2.5 |            |            |                        |
| Pixel size (Å)                                      |            |            |            | 1.064        |            |            |                        |
| Initial particles (no.)                             |            |            |            | 1,003,956    |            |            |                        |
| Symmetry imposed                                    |            |            |            | C1           |            |            |                        |
| Final particles (no.)                               | 194,02     | 62,04      | 74,41      | 141,577      | 39,29      | 71,568     | 249,122                |
| Map resolution (Å)                                  | 6          | 0          | 5          |              | 4          |            |                        |
|                                                     | 3.47       | 3.70       | 3.91       | 3.47         | 3.87       | 6.11       | 3.51                   |
| <b>Refinement</b>                                   |            |            |            |              |            |            |                        |
| R.m.s. deviations                                   | 0.003      | 0.003      | 0.003      | 0.003        | 0.003      | 0.002      | 0.002                  |
| Bond lengths (Å)                                    | 0.539      | 0.506      | 0.499      | 0.557        | 0.527      | 0.437      | 0.524                  |
| Bond angles (°)                                     |            |            |            |              |            |            |                        |
| Validation                                          |            |            |            |              |            |            |                        |
| MolProbity score                                    | 2.52       | 2.48       | 2.46       | 2.50         | 2.53       | 2.41       | 2.88                   |
| Clashscore                                          | 9.18       | 8.06       | 8.38       | 8.44         | 8.14       | 7.67       | 10.97                  |
| Rotamer outlier (%)                                 | 5.14       | 5.34       | 5.30       | 5.39         | 5.97       | 5.33       | 9.21                   |
| Ramachandran plot                                   | 91.75      | 92.00      | 92.74      | 91.84        | 91.67      | 93.20      | 88.62                  |
| Favored (%)                                         | 7.95       | 7.90       | 7.14       | 8.13         | 8.17       | 6.80       | 11.38                  |
| Allowed (%)                                         | 0.30       | 0.11       | 0.13       | 0.03         | 0.16       | 0.00       | 0.00                   |
| Disallowed (%)                                      |            |            |            |              |            |            |                        |
| <b>EMDB</b>                                         | 32655      | 3265       | 3265       | 32659        | 3266       | 32661      | 32654                  |
| <b>PDB</b>                                          | 7WOQ       | 6          | 7          | 7WOU         | 0          | 7WOW       | 7WOP                   |
|                                                     |            | R          | S          |              | V          |            |                        |



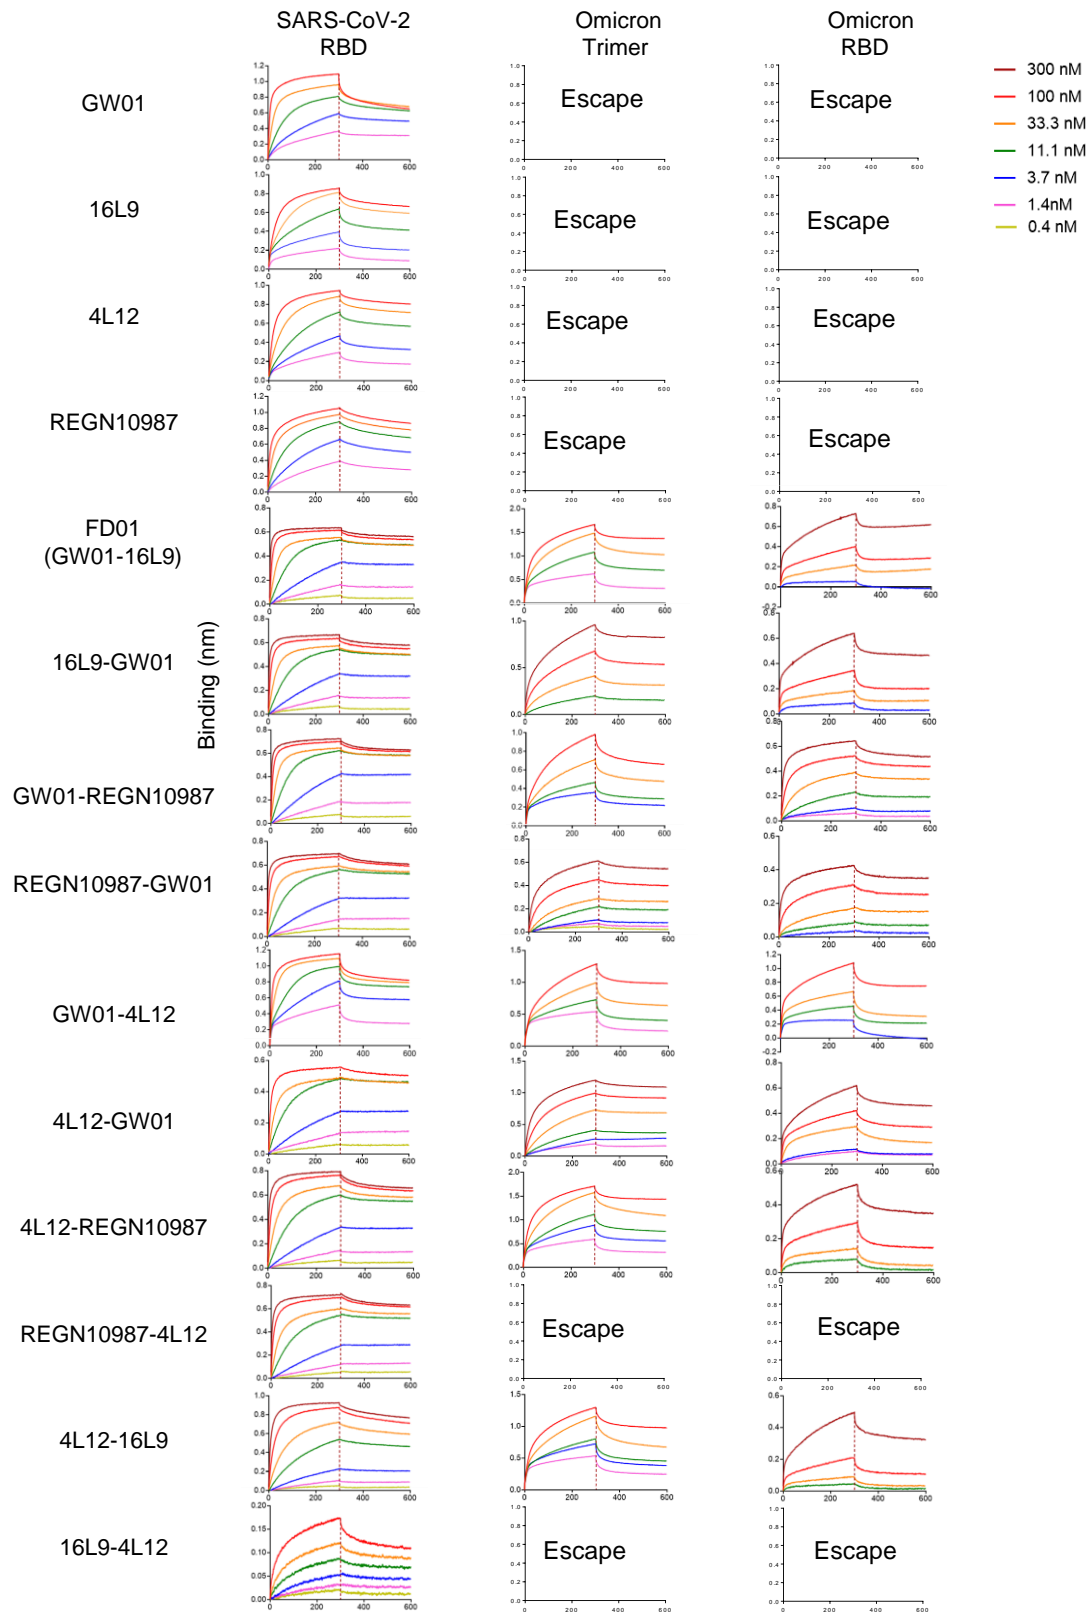

713 **Figure S1. Binding affinities of GW01, 16L9, 4L12, REGN10987, and ten**  
714 **bispecific antibodies to SARS-CoV-2 RBD-his, Omicron trimer-his and**  
715 **Omicron RBD-his measured by bilayer interferometry experiments.**  
716 Antibodies were immobilized on anti-human IgG (AHC) biosensors and then  
717 tested for their binding abilities to the target proteins.

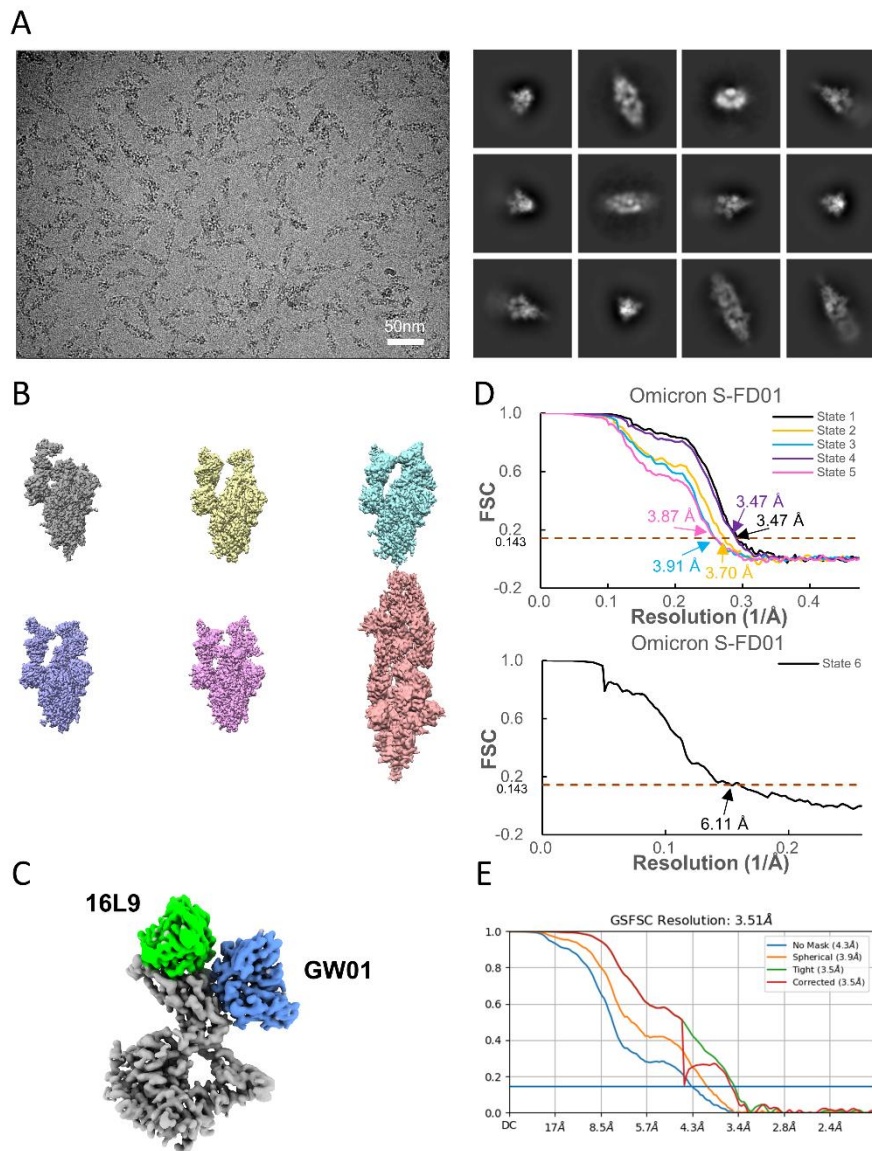

718

719 **Figure S2. Cryo-EM data collection and processing of FD01 bound SARS-**  
720 **CoV-2 Omicron S. (A)** Representative electron micrograph and 2D  
721 classification results of FD01 bound SARS-CoV-2 S. **(B)** The reconstruction  
722 map of the complex structures at six states. **(C)** The local-refined map of the  
723 NRF region. **(D)** Gold-standard Fourier shell correlation curves generated in  
724 RELION for structures of six states. The 0.143 cut-off is indicated by a  
725 horizontal dashed line. **(E)** Gold-standard Fourier shell correlation curves  
726 generated in cryoSPARC for local-refined map.

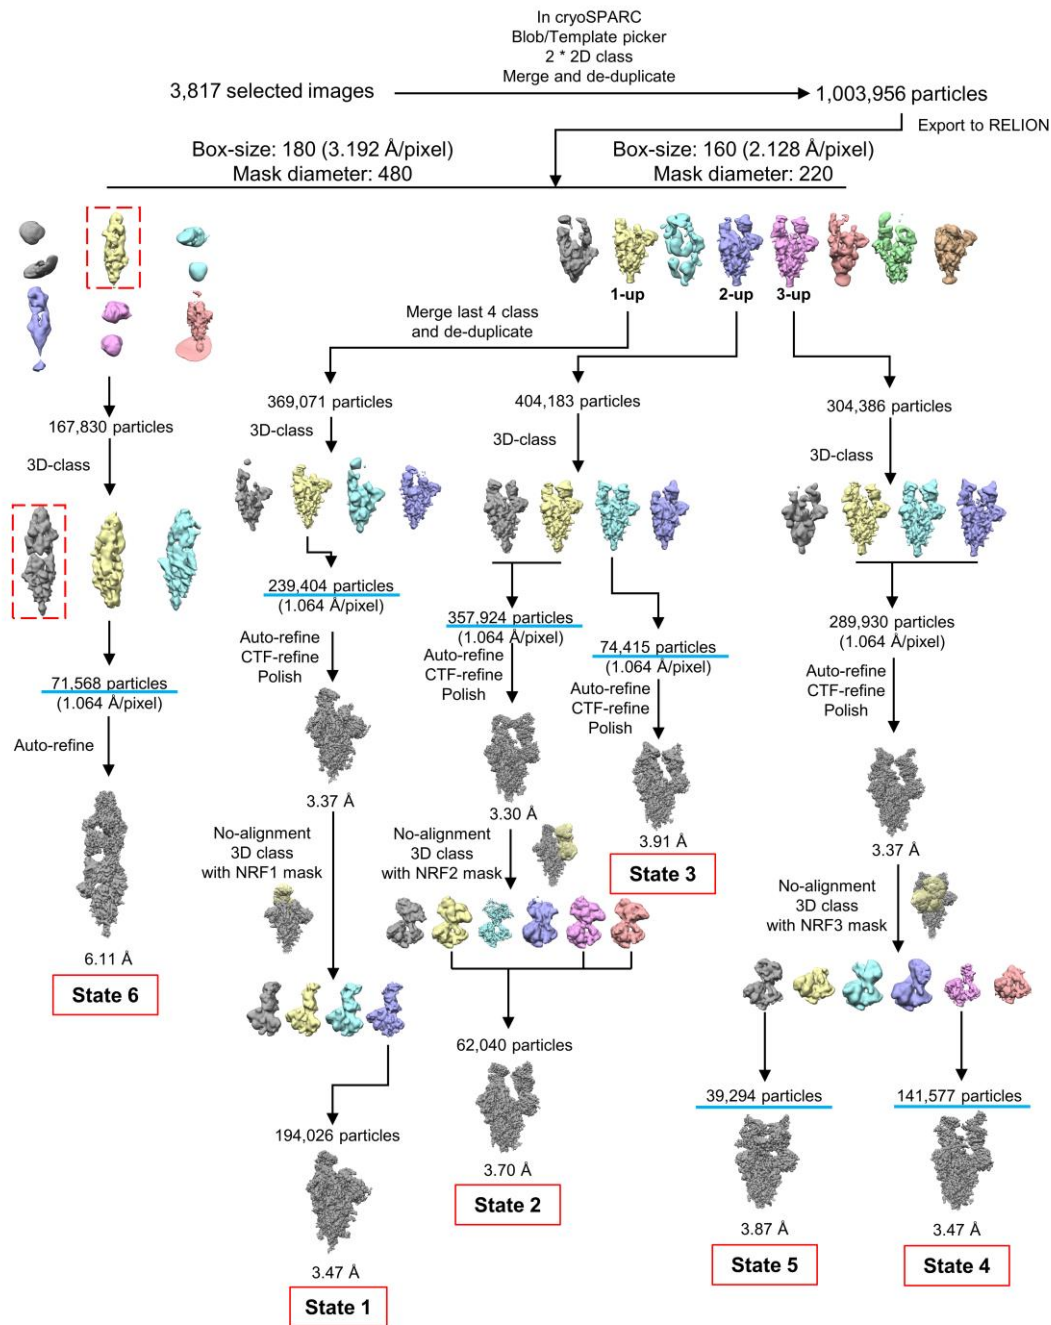

727 **Figure S3. Data processing flowchart of FD01 bound SARS-CoV-2**  
 728 **Omicron S trimer.** Particles number above cyan line is used for particle  
 729 counting statistics.

730

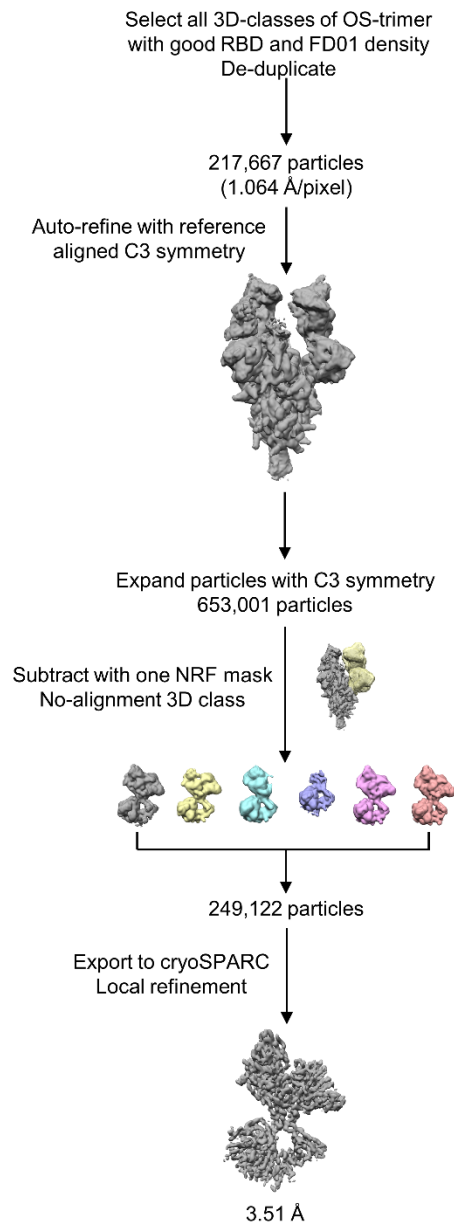

731

732 **Figure S4. Data processing flowchart of local refinement of RBD-FD01.**

733

734

735

736

737

738

739

740

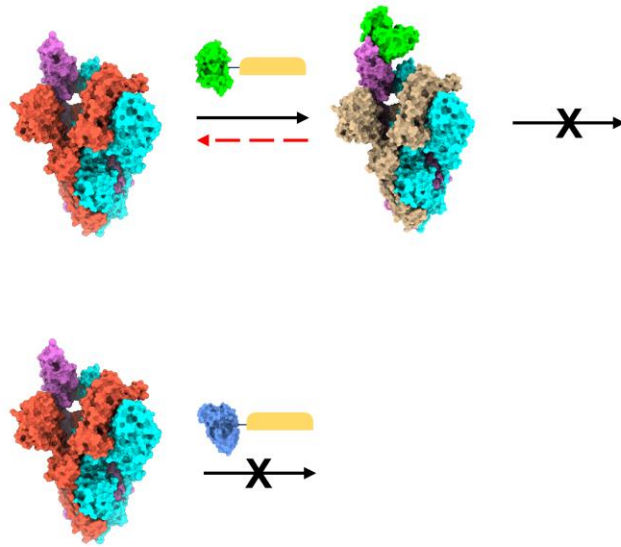

741 **Figure S5. Hypothesis of binding features when Omicron S trimer meets**

742 **with mAbs of 16L9 or GW01.**

743

744
